# Supplementary material for: Incidence of adverse events in Sweden during 2013–2016: a cohort study describing the implementation of a national trigger tool
Source: PubMed Central journal article supplement — BMJ Open. 2018 Mar 30;8(3):e020833. doi: 10.1136/bmjopen-2017-020833 (PMC5884347; doi:10.1136/bmjopen-2017-020833), 2018-03-30
Supplement: bmjopen-2017-020833.draft_revisions.pdf [file bmjopen-2017-020833.draft_revisions.pdf]

# BMJ Open

BMJ Open is committed to open peer review. As part of this commitment we make the peer review history of every article we publish publicly available.

When an article is published we post the peer reviewers' comments and the authors' responses online. We also post the versions of the paper that were used during peer review. These are the versions that the peer review comments apply to.

The versions of the paper that follow are the versions that were submitted during the peer review process. They are not the versions of record or the final published versions. They should not be cited or distributed as the published version of this manuscript.

BMJ Open is an open access journal and the full, final, typeset and author-corrected version of record of the manuscript is available on our site with no access controls, subscription charges or pay-per-view fees (<http://bmjopen.bmj.com>).

If you have any questions on BMJ Open's open peer review process please email [info.bmjopen@bmj.com](mailto:info.bmjopen@bmj.com)

# BMJ Open

## National implementation of a trigger tool and a review of 65 000 hospital admissions in Sweden from 2013–2016.

|                                 |                                                                                                                                                                                                                                                                                                                                                                                                                              |
|---------------------------------|------------------------------------------------------------------------------------------------------------------------------------------------------------------------------------------------------------------------------------------------------------------------------------------------------------------------------------------------------------------------------------------------------------------------------|
| Journal:                        | <i>BMJ Open</i>                                                                                                                                                                                                                                                                                                                                                                                                              |
| Manuscript ID                   | bmjopen-2017-020833                                                                                                                                                                                                                                                                                                                                                                                                          |
| Article Type:                   | Research                                                                                                                                                                                                                                                                                                                                                                                                                     |
| Date Submitted by the Author:   | 27-Nov-2017                                                                                                                                                                                                                                                                                                                                                                                                                  |
| Complete List of Authors:       | Nilsson, Lena; Region Ostergotland, Anesthesia and Intensive care<br>Risberg , Madeleine ; Linköping Region Östergötland, Unit for Health Analysis<br>Soop, Michael; National Board of Health and Welfare, Sweden,<br>Nylen, Urban; The National Board of Health and Welfare<br>Ålenius, Carina; Swedish Association of Local Authorities and Regions<br>Rutberg, Hans; Swedish Association of Local Authorities and Regions |
| <b>Primary Subject Heading</b>: | Health services research                                                                                                                                                                                                                                                                                                                                                                                                     |
| Secondary Subject Heading:      | Epidemiology                                                                                                                                                                                                                                                                                                                                                                                                                 |
| Keywords:                       | Adverse event, Patient harm, Patient safety, Trigger tool                                                                                                                                                                                                                                                                                                                                                                    |
|                                 |                                                                                                                                                                                                                                                                                                                                                                                                                              |

SCHOLARONE™  
Manuscripts

1  
2  
3 National implementation of a trigger tool and a review of 65 000  
4  
5 hospital admissions in Sweden from 2013–2016.  
6  
7

8 Lena Nilsson,<sup>1</sup> Madeleine Borgstedt-Risberg,<sup>2</sup> Michael Soop,<sup>3</sup> Urban Nylén,<sup>3</sup> Carina Ålenius<sup>4</sup>  
9 and Hans Rutberg<sup>4</sup>  
10  
11

12  
13 <sup>1</sup>Department of Anaesthesiology and Intensive Care, Department of Medical and Health  
14 Sciences, Faculty of Medicine and Health Science, Linköping University, Linköping,  
15 Sweden; <sup>2</sup>Centre for Organisational Support and Development (CVU), Region Östergötland,  
16 Linköping University, Linköping, Sweden; <sup>3</sup>National Board of Health and Welfare,  
17 Stockholm, Sweden; <sup>4</sup>Swedish Association of Local Authorities and Regions, Stockholm,  
18 Sweden  
19  
20  
21  
22  
23  
24  
25

26 Corresponding author:  
27

28 Lena Nilsson  
29

30 Department of Anaesthesiology and Intensive Care  
31

32 University Hospital  
33

34 583 81 Linköping  
35

36 Phone: +46(0)10 103 18 38  
37

38 [lenna.nilsson@regionostergotland.se](mailto:lenna.nilsson@regionostergotland.se)  
39

40 Word count: 3211  
41  
42  
43  
44  
45  
46  
47  
48  
49  
50  
51  
52  
53  
54  
55  
56  
57  
58  
59  
60

## Abstract

**Objectives:** To describe the implementation of a trigger tool in Sweden and present the national incidence of adverse events (AEs) over a 4-year period during which an ongoing national patient safety initiative was terminated.

**Design:** Cohort study using retrospective record review based on a trigger tool methodology.

**Setting and participants:** Patients  $\geq 18$  years admitted to all somatic acute care hospitals in Sweden from 2013–2016 were randomised into the study.

**Primary and secondary outcome measures:** Primary outcome measure was the incidence of AEs, and secondary measures were type of injury, severity of harm, preventability of AEs, estimated healthcare cost of AEs and incidence of AEs in patients cared for in another type of unit than the one specialised for their medical needs ('off-site').

**Results:** In a review of 64 917 admissions, the average AE rates in 2014 (11.6%), 2015 (10.9%) and 2016 (11.4%) were significantly lower than in 2013 (13.1%). The decrease in the AE rates was seen in different age groups, in both genders and for preventable and non-preventable AEs. The decrease comprised only the least severe AEs. The types of AEs that decreased were hospital-acquired infections, urinary bladder distention and compromised vital signs. Patients cared for 'off-site' had 84% more preventable AEs than patients cared for in the appropriate units. The cost of increased length of stay associated with preventable AEs corresponded to 13–14% of the total cost of somatic hospital care in Sweden.

**Conclusions:** The rate of AEs in Swedish somatic hospitals has decreased from 2013 to 2016. Retrospective record review can be used to monitor patient safety over time, to assess the effects of national patient safety interventions and analyse challenges to patient safety such as the increasing care of patients 'off-site'. It was found that the economic burden of preventable AEs is high.

**Keywords:** Adverse event, Patient harm, Patient safety, Trigger tool

### Strengths and limitations of this study

- The study includes all somatic acute care hospitals in Sweden, except for paediatric units.
- This is a longitudinal study over a 4-year period during which an ongoing national patient safety initiative was terminated.
- An estimation of the economic cost for prolonged hospital stay due to preventable AEs was undertaken.
- The trigger tool and the national database were adaptive to new triggers and trends in healthcare, thus showing the ability to evaluate new patient safety risks.
- Inherent weaknesses in a retrospective record review are poor documentation quality and the risk of hindsight bias.

### Funding statement

This work was supported by the Swedish Association of Local Authorities and Regions by creating and hosting a national database for the reporting of data from the record reviews.

### Competing interests

The authors declare that they have no competing interests.

### Author's contribution

LN, MB-R, MS, UN, CÅ and HR designed and conducted the study. MB-R statistically analysed the data. HR, UN and CÅ undertook the initial interpretation of the data, which was followed by discussions with all the authors. LN and HR drafted the initial version of the manuscript, which was followed by a critical revision process of the intellectual content involving all the authors. All the authors agreed to the final version of the manuscript before submission. All authors agreed to be accountable for the accuracy of any part of the work.

### Data sharing statement

No additional data are available.

## Introduction

Retrospective medical record review (RRR) is an established and validated method to identify adverse events (AEs).<sup>1-4</sup> The method gives an overview of the incidence, nature, preventability and consequences of AEs. This information can be used in systematic quality improvement work to reduce the incidence of AEs. RRR is superior to clinical incident reporting systems for detecting AEs.<sup>3</sup> A list of criteria (triggers) that indicate a higher probability of AEs may be used to identify details in the record that indicate the presence of AEs. The Institute for Healthcare Improvement (IHI) in the US combined topic- and location-specific trigger tools into one Global Trigger Tool (GTT),<sup>5</sup> which is one of the most commonly used trigger tools. Translated and adapted versions of the GTT are available in, for example, Sweden, Denmark, Norway, Germany, Italy and the UK. Although GTT is considered relevant for measuring AEs at the national level, to the best of our knowledge, only Norway and Sweden have used the methodology for this purpose.<sup>6,7</sup>

The present study describes the implementation of a trigger tool in Sweden, including the development of a national database that covers reviews from all acute care hospitals save for paediatric and psychiatric care. We also present the national yearly incidence of AEs over a 4-year period (2013–2016) and estimate the cost of preventable AEs.

## Methods

### *Implementation of the Swedish trigger tool*

The first national handbook for record review was published in 2008. It was based on the IHI-GTT version 2007, which was translated and adapted to a Swedish context. The Swedish handbook included a six-graded preventability scale used in a national survey on AEs initiated by The National Board of Health and Welfare.<sup>8</sup> The trigger tool methodology gradually spread over the country, and in 2011, hospitals in approximately half of the country's 21 regions used the method.

In 2012, a national group of experienced reviewers, in collaboration with a reference group of reviewers, patient safety experts and researchers in the trigger tool field, revised the national handbook.<sup>9</sup> The work was initiated and financed by the Swedish Association of Local Authorities and Regions (SALAR) as part of a national patient safety initiative. The number of triggers was reduced from 53 to 44 based on the fact that the removed triggers seldom pointed to AEs or were not possible to identify in the review. Others were merged together

1  
2  
3 and renamed. Ten new triggers were added based on local review teams' findings and  
4 research pointing to these common AEs. An example of a new trigger added was urinary  
5 bladder distension.<sup>10,11</sup> Review teams were educated in all regions in a coordinated effort  
6 within a national patient safety initiative, which promoted and financially rewarded record  
7 review. This contributed to the rapid use of the method by all somatic acute care hospitals.  
8  
9  
10

### 11 12 ***National patient safety initiative and database*** 13

14 Launched by the Swedish government and SALAR, a national initiative to increase patient  
15 safety took place from 2011–2014. The initiative involved financial incentives and included,  
16 among other things, safer use of drugs, prevention of resistance to antibiotics, reduction of  
17 hospital-acquired infections and measurement of the patient safety culture. As a result of the  
18 national initiative, by 2013, all somatic hospitals involved in acute care (n=63) undertook  
19 monthly reviews of patient records to determine the rate and nature of AEs. A database was  
20 developed by SALAR in 2012, and in this database, the review results from each hospital  
21 were entered. These included hospital type, medical speciality, the patient's gender, age and  
22 length of hospital stay and the type, severity and preventability of AEs. The monthly reviews  
23 continued after the termination of the national patient safety initiative in December 2014, and  
24 by December 2016, the database included almost 65 000 admissions.  
25  
26  
27  
28  
29  
30  
31  
32

33 The database was expanded in 2015 to include information on risk factors for AEs, such as  
34 acute admission, surgical intervention and care provided in another type of unit other than the  
35 one specialised for the patient's medical needs ('off-site').  
36  
37  
38  
39

### 40 ***Inclusion criteria and sampling*** 41

42 From 2013–2014, the minimum monthly number of randomly selected admissions reviewed  
43 was 40 for university hospitals, 30 for the central county council hospitals and 20 for the  
44 county hospitals. In 2015, the number of reviewed records was reduced by 50%. Somatic  
45 hospital admissions from patients aged 18 years or older with a hospital stay of at least 24  
46 hours were eligible for inclusion. All records from the whole period of hospitalisation were  
47 reviewed, which sometimes included more than one type of department.  
48  
49  
50  
51  
52

### 53 ***Review process*** 54 55 56 57 58 59 60

1  
2  
3 Each hospital had its own review team. The review teams consisted of one or two nurses and  
4 at least one physician. All team members were senior level, had special training in the record  
5 review method and had an interest and knowledge in the field of patient safety. The team  
6 members often represented different medical specialties.  
7  
8

9  
10 A nurse first screened the records for the presence of triggers and possible AEs. In the second  
11 review stage, the team assessed the occurrence of AEs. All AEs were categorised according to  
12 type, severity and preventability using the national handbook. The physician made the final  
13 decisions. There was no assessment of interrater reliability.  
14  
15  
16

### 17 18 19 ***Categorisation of adverse events***

20 An AE was defined as an unintended physical injury resulting from or contributed to by  
21 medical care that required additional monitoring, treatment or hospitalisation or that resulted  
22 in death. An AE was categorised into one of 16 different types (Table 3). A hospital-acquired  
23 infection was defined as either an infection associated with previous in-hospital treatment or  
24 an infection occurring 48 hours after hospitalisation or within 48 hours after discharge from  
25 the hospital. Each AE could only be categorised into one type.  
26  
27  
28  
29

30  
31 AEs were categorised into one of five severity categories, per the National Coordination  
32 Council for Medication Error Reporting and Prevention index: Category E: contributed to or  
33 resulted in temporary harm and required intervention; Category F: contributed to or resulted  
34 in temporary harm requiring outpatient care, readmission or prolonged hospital care; Category  
35 G: contributed to or caused permanent patient harm; Category H: event that required  
36 lifesaving intervention within 60 minutes and Category I: contributed to the patient's death.  
37  
38  
39  
40  
41

42  
43 An AE was categorised as being preventable or not by using a graded scale of four options: 1.  
44 The AE was 'not preventable'; 2. 'probably not preventable'; 3. 'probably preventable'; and  
45 4. 'certainly preventable'. The handbook gives detailed instructions concerning the difficult  
46 assessment of preventability (Supplementary table S1). AEs categorised as 1 and 2 are  
47 denoted as non-preventable, and AEs categorised as 3 and 4 are denoted as preventable in the  
48 following text and figures.  
49  
50  
51  
52  
53

### 54 55 ***Ethics***



1  
2  
3 The study was conducted in compliance of the Declaration of Helsinki (World Medical  
4 Association, 2013), and because it was a part of quality improvement initiatives in the  
5 hospitals, an approval from an ethical committee was not necessary. The principles published  
6 in the national ethical guidelines for research were followed (SFS 2003:460). Names and  
7 personal identification numbers were not collected or entered into the database.  
8  
9  
10

### 11 12 **Statistics**

13  
14 Data are presented as number (percent), median (range), mean (SD) or mean (95% CI). A  
15 comparison of the proportions between two groups was made by chi-squared test. Confidence  
16 intervals were calculated using a normal distribution approximation. A p-value <0.05 was  
17 considered significant. All statistical calculations were made using SPSS Version 22, IBM,  
18 New York, United States.  
19  
20  
21  
22

### 23 24 **Results**

#### 25 **Results of GTT 2013–2016**

26 A total of 64 917 admissions were reviewed in 59–63 hospitals during the years 2013–2016.  
27 The number of hospitals decreased over the period because two of the hospitals stopped  
28 reviewing, and two merged with another hospital (Table 1). From the beginning of 2013 to the  
29 middle of 2015, there was a continuous decline in the average monthly rates of admissions  
30 with AEs and preventable AEs (Figure 1). During the second half of 2015, the rates of AEs  
31 increased slightly and subsequently stabilised.  
32  
33  
34  
35  
36  
37

38 The proportion of admissions with preventable AEs decreased significantly between 2013 and  
39 the years 2014, 2015 and 2016, respectively. No significant differences were seen between the  
40 other years (Table 1).  
41  
42  
43

44 The decrease in the AE rate can largely be attributed to a reduction in the least severe AEs  
45 (Category E) (Table 2). The types of AEs that decreased significantly were hospital-acquired  
46 infections, urinary bladder distention, compromised vital signs and ‘other’ (Table 3). The  
47 latter group included allergic reaction, haemorrhage not related to surgery, venous thrombosis  
48 or pulmonary embolus, superficial blood vessel or skin harm, anaesthetic-related AE and any  
49 other AE. Among the hospital-acquired infections, there were significant reductions in the  
50 rate of admissions with pneumonia, ventilator-associated pneumonia and ‘other infections’.  
51  
52  
53  
54  
55  
56

1  
2  
3  
4 When aggregating data for the years 2013–2016, 11.4% of the AEs were categorised as ‘not  
5 preventable’, 27.2% as ‘probably not preventable’, 39.4% as ‘probably preventable’, and  
6 22.0% as ‘certainly preventable’. Consequently, 66.6% of the AEs were judged to be  
7 preventable (probably and certainly preventable). The types of AEs considered most  
8 preventable were pressure ulcer (91%) and urinary bladder distention (88%). The  
9 corresponding preventability rates were for hospital-acquired infections (60%), fall injuries  
10 (60%), AEs caused by surgery or invasive procedures (56%), ‘other’ (54%), drug-related AE  
11 (46%), compromised vital signs (41%), neurological AE (38%) and postpartum or obstetric  
12 AE (41%).  
13  
14  
15  
16  
17  
18  
19

20 AEs were more common in patients aged 65 years or older than in patients 18–64 years of age  
21 ( $p=0.00$ ). The number of admissions with AEs decreased between 2013 and 2016 in the  
22 younger ( $P=0.02$ ) and older patient groups ( $p=0.00$ ) (Figure 2). The reductions were  
23 significant also for the ‘preventable AEs’ (younger  $p=0.05$ , older  $p=0.00$ ).  
24  
25  
26  
27

28 When aggregating data for the years 2013–2016, men had a significantly higher rate of  
29 admissions with AEs than women (12.5% vs. 11.5%,  $p=0.00$ ). Men had significantly higher  
30 rates of hospital-acquired infections and urinary bladder distention.  
31  
32  
33  
34

35 Aggregated data for 2015–2016 showed that the incidence of preventable AEs was almost  
36 100% higher in patients who had undergone surgery or another invasive procedure ( $n=9584$ ;  
37  $p=0.00$ ) and approximately 84% higher in patients treated in another unit than the unit  
38 specialised to their medical needs (‘off-site’) ( $n=984$ ;  $p=0.00$ ). No difference in AE rates was  
39 found between acute and planned admissions ( $p=0.72$ ) (Figure 3).  
40  
41  
42  
43  
44

45 Acute admissions were more common in males compared to women (80.5% vs. 78.5%,  
46  $p=0.001$ ) and in patients aged 65 years or older compared to patients under 65 years of age  
47 (82.2% vs. 73.7%,  $p=0.00$ ). The proportion of admissions where the patient underwent  
48 surgery or another invasive procedure did not differ between the genders. In patients who had  
49 surgery, the rate of AEs was higher in acute admissions than in planned admissions (19.1%  
50 vs. 13.1%,  $p=0.00$ ).  
51  
52  
53  
54  
55  
56  
57  
58  
59  
60

1  
2  
3 The proportion of patients cared for 'off-site' increased from 3.1% in 2015 to 4.5% in 2016  
4 (p=0.00). Patients aged 65 years or older were more often treated 'off-site' than younger  
5 patients (4.1% vs. 3.1%, p=0.00). No differences related to gender were observed. The most  
6 common type of AEs in patients cared for 'off-site' were hospital-acquired infections (36.0%)  
7 and 'other' (19.8%), which includes skin injury, superficial vessel injury and vein thrombosis  
8 or pulmonary embolism.  
9  
10  
11

12  
13  
14 The mean (SD) length of hospital stay (LOS) in aggregated data for 2013–2016 was 7.1 (8.1)  
15 days. LOS for the admissions without AEs was 6.2 (6.6) days while admissions with  
16 preventable AEs was 14.2 (14.5) days. A significantly longer LOS in patients with AEs was  
17 seen in both age groups of both men and women (Figure 4). The LOS was significantly longer  
18 in older patients ( $\geq 65$  years) than in younger (18–64 years) both for patients with and without  
19 AEs.  
20  
21  
22  
23

24  
25 The mean difference in LOS between hospital stays without AEs and those with preventable  
26 AEs was 8 days. The average incidence of preventable AEs (2013–2016) was 8%, and the  
27 average number of hospital admissions per year was almost 1.4 million. Accordingly, it can  
28 be estimated that preventable AEs affected some 110 000 hospital admissions per year and  
29 were associated with 880 000 extra days of hospitalisation. With the mean cost for 1 day of  
30 hospitalisation being approximately 10 000 SEK, the annual cost for preventable AEs can be  
31 estimated at 880 million euros. This corresponds to approximately 13–14% of the total cost of  
32 adult somatic hospital care in Sweden. During 2015 and 2016, approximately 13 000 records  
33 were reviewed yearly. The estimated annual total cost for record review was 0.4–0.5 million  
34 euros.  
35  
36  
37  
38  
39  
40  
41  
42

### 43 ***National feedback of the results based on GTT***

44 Regular yearly reports from SALAR described the development of AE rates on an aggregated  
45 national level. Also, specific reports for surgical care,<sup>12</sup> orthopaedic care,<sup>13</sup> obstetrics and  
46 gynaecology<sup>14</sup> and hospital-acquired infections<sup>15</sup> were published. The mapping of AEs is an  
47 important basis for improvement work. In 2016, SALAR published an inventory of all patient  
48 safety initiatives undertaken by hospitals or departments based on the record review findings.  
49  
50  
51  
52  
53 The prominent areas for the 268 different improvement initiatives were pressure ulcers,  
54  
55  
56  
57  
58  
59  
60

1  
2  
3 education of patient safety experts, falls, healthcare-associated infections, urinary bladder  
4 distension, surgical harm and compromised vital signs.  
5  
6

## 7 **Discussion**

8  
9 From our nationwide review of almost 65 000 randomly selected admissions to acute care  
10 hospitals, we have shown there was a reduction in the rate of AEs between 2013 and 2014,  
11 2015 and 2016, respectively. However, a gradual decrease in the rate of admissions with AEs  
12 was seen from 2013 until mid-2015; thereafter, the AE rate rose to, and stabilised at, a slightly  
13 higher level. The initial gradual decrease in AE rate could reflect the focus on patient safety  
14 promoted by the national patient safety initiative. The decrease in the rate of AEs continued 6  
15 months after the termination of the initiative (2014), which may indicate that the effect of the  
16 4-year long initiative persisted for a short period after it was terminated. The subsequent  
17 broken trend after the termination of the patient safety initiative may reflect the hospital  
18 leadership shifting their focus and a subsequent decrease in the efforts to reduce the rate of  
19 AEs. Conceivably, other factors not related to the initiative may have influenced the trends  
20 seen in the AE rates. The higher proportion of patients treated 'off-site' 2016 compared to  
21 2015 might explain to some extent the increase in the rates of AEs.  
22  
23  
24  
25  
26  
27  
28  
29  
30

31  
32 The study has some strengths. To our knowledge, the current study is the largest published  
33 trigger tool study, including all somatic acute hospitals in Sweden, save for paediatric and  
34 psychiatric care. Also, the current study covers a substantial period of time. The revision of  
35 the trigger tool made it possible to add triggers found to indicate AEs that were not included  
36 in the initial IHI tool, for example, urinary bladder distension, and the national database  
37 enabled a continuous systematic, but also flexible, collection of data because we were able to  
38 add administrative data that enabled the detection of safety risks connected to trends in  
39 healthcare, for example, increasing 'off-site' care. The trigger tool has high specificity, high  
40 reliability, is more sensitive than other methods,<sup>16,17</sup> and large-scale implementations of the  
41 GTT including modifications have been successful in other studies.<sup>6,18,19</sup>  
42  
43  
44  
45  
46  
47  
48  
49

50 In retrospective record review studies, a potential weakness is poor documentation quality,  
51 which means only documented AEs can be identified. Another weakness is the risk of  
52 hindsight bias when assessing the preventability of AEs. Two-thirds of the AEs were  
53 classified as 'probably preventable' or 'probably not preventable', which illustrates the  
54  
55  
56

1  
2  
3 difficulty in determining for certain if the AEs could have been prevented. The number of  
4 reviewed admissions from university hospitals, central county council hospitals and small  
5 hospitals does not fully reflect the true proportion of admissions to these hospital categories.  
6 Because the rates of AEs differ between hospital types, this must be taken into account when  
7 estimating the true national average rate of AEs. When doing so, the national rates of AEs  
8 presented in this paper increase by approximately 10%.

9  
10  
11  
12  
13  
14 We have demonstrated an increased rate of AEs in patients cared for in another type of unit  
15 other than the one specialised for their medical needs. The main reason why patients are cared  
16 for 'off-site' is a shortage of available beds due to lack of nurses. Actions need to be taken to  
17 reduce the number of 'off-site' patients.

18  
19  
20  
21  
22 As shown earlier,<sup>20</sup> a hospital-acquired infection is the most common type of AE, and its  
23 incidence fell during the study period. Evidence-based programs to prevent central venous  
24 catheter-associated infections, postoperative wound infections and urinary tract infections  
25 were promoted nationally during the study period. This was carried out by conducting a  
26 continuous follow-up on compliance to basic hygiene rules and dress code on a department  
27 level. Conceivably, the promotion of measures to reduce the incidence of hospital-acquired  
28 infections during the patient safety initiative was successful and resulted in a reduction of  
29 infection rates.

30  
31  
32  
33  
34  
35  
36  
37 Urinary bladder distention was most often regarded as preventable, and the rates decreased  
38 over time. This could in part be because of the use of a stricter definition after 2013, but this  
39 problem was extensively addressed by physicians as well as nursing organisations. The  
40 decrease in the rates of compromised vital signs could reflect an increased use of vital sign  
41 checks, such as the modified early warning score (MEWS)<sup>21</sup> and rapid response teams.<sup>22</sup>

42  
43  
44  
45  
46 The higher incidence of AEs found among men can partly be attributed to their higher rates of  
47 hospital-acquired infections and urinary bladder distention. The reason behind the former  
48 remains to be explained. Another explanation is that the present study included gynaecology  
49 and obstetrics, where AE rates are lower than in other medical disciplines.<sup>23</sup>

1  
2  
3 The suffering associated with patient harm for the patients, relatives and involved personnel is  
4 high but cannot easily be quantified. There is also an economic burden associated with patient  
5 harm, both on healthcare and society. The golden standard to estimate the financial cost of  
6 AEs for healthcare is considered to be retrospective record review.<sup>24</sup> Our estimate, based  
7 solely on the costs of prolonged LOS, is in line with a recent report that suggested that 15% of  
8 hospital expenditures in Organisation for Economic Co-operation and Development (OECD)  
9 countries relate to AEs.<sup>25</sup> These entail additional treatment and diagnostic procedures,  
10 (re)admission to hospital and a prolonged hospital stay. In line with our finding, the OECD  
11 report estimated that 6–8 additional days are spent in the hospital for patients having an AE.<sup>23</sup>  
12 With a longer LOS, it is probable that patients are more exposed to AEs. However, our group  
13 has previously shown that AEs most often occur early during the hospital stay or cause the  
14 hospitalisation.<sup>26</sup> The OECD report<sup>25</sup> emphasises that the costs for preventive actions are  
15 substantially lower than the costs of AEs.  
16  
17  
18  
19  
20  
21  
22  
23  
24

25 To our knowledge, Norway is the only country that so forth has evaluated the effect of a  
26 national patient safety initiative using monthly assessments of AE rates based on GTT.  
27 Accordingly, some 40 000 hospital admissions were reviewed during the Norwegian patient  
28 safety campaign, and AE rates decreased from 16.1% (2011) to 13.0% (2013).<sup>6</sup> The rates and  
29 types of AEs in Norway and Sweden in 2013 have been shown to be similar.<sup>7</sup>  
30  
31  
32  
33  
34

35 In conclusion, AE rates in Swedish somatic acute care hospitals decreased between 2013 and  
36 2014, 2015 and 2016, respectively. Retrospective record review is a useful method to monitor  
37 patient safety over time and to assess the effects of national patient safety interventions. Off-  
38 site care of patients is becoming more common. This increases the incidence of AEs and is a  
39 challenge to patient safety. The economic burden of preventable AEs is high.  
40  
41  
42  
43  
44  
45  
46  
47  
48  
49  
50  
51  
52  
53  
54  
55  
56  
57  
58  
59  
60

## References

1. Naessens JM, Campbell CR, Huddleston JM, et al. A comparison of hospital adverse events identified by three widely used detection methods. *Int J Qual Health Care* 2009;21:301–7.
2. Christiaans-Dingelhoff I, Smits M, Zwaan L, et al. To what extent are adverse events found in patient records reported by patients and healthcare professionals via complaints, claims and incident reports? *BMC Health Serv Res* 2011;11:49.
3. Classen David C, Resar R, Griffin F, et al. "Global Trigger Tool" shows that adverse events in hospitals may be ten times greater than previously measured. *Health Aff* 2011;30:581–9.
4. Unbeck M, Muren O, Lillkrona U. Identification of adverse events at an orthopaedics department in Sweden. *Acta Orthop* 2008;79:396–403.
5. Griffin FA, Resar RK. IHI Global Trigger Tool for measuring adverse events. IHI Innovation Series white paper. Cambridge, Massachusetts: Institute for Healthcare Improvement; 2007.
6. Deilkås ET, Bukholm G, Lindstrom JC, et al. Monitoring adverse events in Norwegian hospitals from 2010 to 2013. *BMJ Open* 2015;5:e008576.
7. Deilkås ET, Risberg MB, Haugen M, et al. Exploring similarities and differences in hospital adverse event rates between Norway and Sweden using Global Trigger Tool. *BMJ Open* 2017;7:e012492.
8. Soop M, Fryksmark U, Köster M, et al. The incidence of adverse events in Swedish hospitals: a retrospective medical record review study. *Int J Qual Health Care* 2009;21:285–91.
9. Markörbaserad Journalgranskning för att identifiera och mäta skador i vården [in Swedish]. Sveriges kommuner och Landsting: ETC kommunikation; 2012:ISBN: 978-917-164-847.
10. Unbeck M, Dalen N, Muren O, et al.. Healthcare processes must be improved to reduce the occurrence of orthopaedic adverse events. *Scand J Caring Sci*. 2010;24:671–7.
11. Joelsson-Alm E, Nyman CR, Lindholm C, et al. Perioperative bladder distension: a prospective study. *Scand J Urol Nephrol*. 2009;43:58-62.



- 1  
2  
3 12. Nilsson L, Risberg MB, Montgomery A, et al. Preventable adverse events in surgical care  
4 in Sweden: a nationwide review of patient notes. *Medicine (Baltimore)* 2016;95:e3047.  
5  
6  
7 13. Rutberg H, Borgstedt-Risberg M, Gustafson P, et al. Adverse events in orthopedic care  
8 identified via the Global Trigger Tool in Sweden—implications on preventable prolonged  
9 hospitalizations. *Patient Saf Surg.* 2016;10:23.  
10  
11  
12 14. Skador i vården- skadefrekvens och skadepanorama för obstetric och gynekologi (In  
13 Swedish) [http://lof.se/wp-content/uploads/Skador-i-vården-skadefrekvens-och-](http://lof.se/wp-content/uploads/Skador-i-vården-skadefrekvens-och-skadepanorama-för-obstetrik-och-gynekologi.pdf)  
14 [skadepanorama-för-obstetrik-och-gynekologi.pdf](http://lof.se/wp-content/uploads/Skador-i-vården-skadefrekvens-och-skadepanorama-för-obstetrik-och-gynekologi.pdf) (Accessed Sept 2017)  
15  
16  
17  
18 15. Vårdrelaterade infektioner. Kunskap, konsekvenser, kostnader (In Swedish). ISBN: 978-  
19 91-7585-475-5 <http://webbutik.skl.se/bilder/artiklar/pdf/7585-475-5.pdf?issuusl=ignore>  
20 (Accessed Sept 2017)  
21  
22  
23  
24 16. Sharek PJ, Parry G, Goldmann D, et al. Performance characteristics of a methodology to  
25 quantify adverse events over time in hospitalized patients. *Health Serv Res.* 2011;46:654–78.  
26  
27  
28 17. Naessens JM, O'Byrne TJ, Johnson MG, et al. Measuring hospital adverse events:  
29 assessing inter-rater reliability and trigger performance of the Global Trigger Tool. *Int J Qual*  
30 *Health Care.* 2010;22:266–74.  
31  
32  
33  
34 18. Good VS, Saldaña M, Gilder R, et al. Large-scale deployment of the Global Trigger Tool  
35 across a large hospital system: refinements for the characterisation of adverse events to  
36 support patient safety learning opportunities. *BMJ Qual Saf.* 2011;20:25–30.  
37  
38  
39  
40 19. Garrett PR Jr, Sammer C, Nelson A, et al. Developing and implementing a standardized  
41 process for global trigger tool application across a large health system. *Jt Comm J Qual*  
42 *Patient Saf.* 2013;39:292–7.  
43  
44  
45  
46 20. Hibbert PD, Molloy CJ, Hooper TD, et al. The application of the Global Trigger Tool: a  
47 systematic review. *Int J Qual Health Care* 2016;28:640–9.  
48  
49  
50 21. Smith ME, Chiovaro JC, O'Neil M, et al. Early warning system scores for clinical  
51 deterioration in hospitalized patients: a systematic review. *Ann Am Thorac Soc.*  
52 2014;11:1454–65.  
53  
54  
55  
56  
57  
58  
59  
60



- 1  
2  
3 22. Solomon RS, Corwin GS, Barclay DC, et al. Effectiveness of rapid response teams on  
4 rates of in-hospital cardiopulmonary arrest and mortality: a systematic review and meta-  
5 analysis. *J Hosp Med*. 2016;11:438–45.  
6  
7  
8 23. Leape LL, Brennan TA, Laird N, et al. The nature of adverse events in hospitalized  
9 patients — results of the Harvard Medical Practice Study II. *N Engl J Med*. 1991;324:377–  
10 384.  
11  
12 24. Jackson T. One dollar in seven: Scoping the Economics of Patient Safety. *The Canadian*  
13 *Patient Safety Institute* 2009;  
14 [http://www.patientsafetyinstitute.ca/en/toolsResources/Research/commissionedResearch/Eco-](http://www.patientsafetyinstitute.ca/en/toolsResources/Research/commissionedResearch/EconomicsofPatientSafety/Documents/Economics%20of%20Patient%20Safety%20Literature%20Review.pdf)  
15 [nomicsofPatientSafety/Documents/Economics%20of%20Patient%20Safety%20Literature%2](http://www.patientsafetyinstitute.ca/en/toolsResources/Research/commissionedResearch/EconomicsofPatientSafety/Documents/Economics%20of%20Patient%20Safety%20Literature%20Review.pdf)  
16 [0Review.pdf](http://www.patientsafetyinstitute.ca/en/toolsResources/Research/commissionedResearch/EconomicsofPatientSafety/Documents/Economics%20of%20Patient%20Safety%20Literature%20Review.pdf) (Accessed Sept 2017)  
17  
18  
19  
20  
21 25. Slawomirski L, Aaraaen A, Klazinga N. The economics of patient safety: strengthening a  
22 value-based approach to reducing patient harm at national level. OECD, Directorate for  
23 Employment, Labour and Social Affairs; 2017.  
24  
25  
26  
27 26. Rutberg H, Borgstedt Risberg M, Sjödaahl R, et al. Characterisations of adverse events  
28 detected in a university hospital: a 4-year study using the Global Trigger Tool method. *BMJ*  
29 *Open*. 2014;4:e004879.  
30  
31  
32  
33  
34

### 35 **Acknowledgments**

36 The authors are grateful for the contribution from all review teams.  
37  
38  
39  
40  
41  
42  
43  
44  
45  
46  
47  
48  
49  
50  
51  
52  
53  
54  
55  
56  
57  
58  
59  
60

Table 1. The number of hospitals and admissions, demographics and the proportion of admissions with adverse events and preventable adverse events

|                                                  | 2013                          | 2014                          | 2015                          | 2016                          |
|--------------------------------------------------|-------------------------------|-------------------------------|-------------------------------|-------------------------------|
| Number of hospitals                              | 63                            | 63                            | 62                            | 59                            |
| Number of admissions                             | 19 927                        | 18 629                        | 13 771                        | 12 590                        |
| Age (median (range)), years                      | 71 (18-105)                   | 71 (18-109)                   | 71 (18-108)                   | 72 (18-105)                   |
| Men, percent                                     | 46,8                          | 46,0                          | 47,1                          | 48,0                          |
| Admissions with AEs, percent (95%CI)             | 13.1 (12.7-13.6) <sup>a</sup> | 11.6 (11.2-12.1) <sup>a</sup> | 10.9 (10.4-11.4) <sup>a</sup> | 11.4 (10.9-12.0) <sup>a</sup> |
| Admissions with preventable AEs, percent (95%CI) | 8.7 (8.3-9.1) <sup>a</sup>    | 7.4 (7.1-7.8) <sup>a</sup>    | 7.0 (6.6-7.4) <sup>a</sup>    | 7.2 (6.7-7.6) <sup>a</sup>    |

AE: adverse event; CI: 95% confidence interval; <sup>a</sup>significant differences compared to 2013

Table 2. Proportion (percent (95%CI)) of admissions with adverse events classified according to severity

|                                                                                                                   | 2013          | 2014                       | 2015                       | 2016                       |
|-------------------------------------------------------------------------------------------------------------------|---------------|----------------------------|----------------------------|----------------------------|
| <b>Severity</b>                                                                                                   |               |                            |                            |                            |
| E: contributed to or resulted in temporary harm and required intervention                                         | 7.4 (7.0-7.8) | 6.1 (5.7-6.4) <sup>a</sup> | 5.5 (5.1-5.9) <sup>a</sup> | 6.0 (5.6-6.4) <sup>a</sup> |
| F: contributed to or resulted in temporary harm requiring outpatient care, readmission or prolonged hospital care | 6.1 (5.8-6.5) | 5.8 (5.5-6.2)              | 5.7 (5.4-6.1)              | 5.8 (5.4-6.2)              |
| G: contributed to or caused permanent patient harm                                                                | 0.4 (0.3-0.5) | 0.3 (0.2-0.4)              | 0.3 (0.2-0.4)              | 0.4 (0.3-0.5)              |
| H: event that required lifesaving intervention required within 60 minutes                                         | 0.1 (0.1-0.1) | 0.1 (0.0-0.1)              | 0.1 (0.1-0.2)              | 0.1 (0.0-0.2)              |
| I: contributed to the patient's death                                                                             | 0.3 (0.2-0.4) | 0.2 (0.2-0.3)              | 0.2 (0.2-0.3)              | 0.2 (0.2-0.3)              |

AE: adverse event; CI: 95% confidence interval; <sup>a</sup>significant differences compared to 2013.

Table 3. Proportion (percent (95 % CI)) of admissions with adverse events classified according to type

|                                           | 2013             | 2014                          | 2015                          | 2016                          |
|-------------------------------------------|------------------|-------------------------------|-------------------------------|-------------------------------|
| <b>Type</b>                               |                  |                               |                               |                               |
| Hospital-acquired infection               | 5.2<br>(4.9-5.5) | 4.6<br>(4.3-4.9) <sup>a</sup> | 4.5<br>(4.1-4.8) <sup>a</sup> | 4.3<br>(4.0-4.7) <sup>a</sup> |
| Infection other                           | 1.4<br>(1.2-1.6) | 1.0<br>(0.8-1.1) <sup>a</sup> | 1.1<br>(0.9-1.3)              | 0.9<br>(0.8-1.1) <sup>a</sup> |
| Urinary tract infection                   | 1.4<br>(1.3-1.6) | 1.5<br>(1.4-1.7)              | 1.3<br>(1.1-1.5)              | 1.3<br>(1.1-1.5)              |
| Postoperative wound infection             | 1.2<br>(1.1-1.4) | 1.2<br>(1.0-1.3)              | 1.1<br>(0.9-1.2)              | 1.1<br>(0.9-1.3)              |
| Pneumonia                                 | 0.7<br>(0.6-0.8) | 0.5<br>(0.4-0.6) <sup>a</sup> | 0.5<br>(0.4-0.6) <sup>a</sup> | 0.5<br>(0.4-0.6) <sup>a</sup> |
| Sepsis                                    | 0.5<br>(0.4-0.6) | 0.3<br>(0.3-0.4) <sup>a</sup> | 0.4<br>(0.3-0.6)              | 0.5<br>(0.4-0.6)              |
| Central venous line infection             | 0.2<br>(0.1-0.2) | 0.1<br>(0.0-0.1)              | 0.1<br>(0.0-0.1)              | 0.1<br>(0.0-0.2)              |
| Ventilator associated pneumonia           | 0.1<br>(0.1-0.2) | 0.0<br>(0.0-0.1) <sup>a</sup> | 0.1<br>(0.0-0.1)              | 0.1<br>(0.0-0.1) <sup>a</sup> |
| Clostridium difficile infection           | -                | 0.3<br>(0.2-0.3)              | 0.3<br>(0.2-0.3)              | 0.3<br>(0.2-0.3)              |
| Other                                     | 2.7<br>(2.5-3.0) | 2.4<br>(2.2-2.7)              | 2.0<br>(1.8-2.3) <sup>a</sup> | 2.2<br>(2.0-2.5) <sup>a</sup> |
| AEs caused by surgery/invasive procedures | 1.9<br>(1.7-2.1) | 1.8<br>(1.6-2.0)              | 1.8<br>(1.6-2.0)              | 1.6<br>(1.4-1.8)              |
| Urinary bladder distention                | 1.7<br>(1.5-1.9) | 1.0<br>(0.9-1.2) <sup>a</sup> | 1.0<br>(0.9-1.2) <sup>a</sup> | 1.1<br>(0.9-1.3) <sup>a</sup> |
| Drug-related AE                           | 1.4<br>(1.3-1.6) | 1.4<br>(1.2-1.6)              | 1.3<br>(1.1-1.5)              | 1.5<br>(1.3-1.7)              |
| Pressure ulcer (grade 2-4)                | 1.1<br>(1.0-1.3) | 1.0<br>(0.9-1.1)              | 1.2<br>(1.0-1.4)              | 1.3<br>(1.1-1.5)              |
| Fall injury                               | 0.8<br>(0.7-0.9) | 0.9<br>(0.7-1.0)              | 0.7<br>(0.5-0.8)              | 0.7<br>(0.6-0.9)              |
| Compromised vital signs                   | 0.5<br>(0.4-0.6) | 0.3<br>(0.2-0.3) <sup>a</sup> | 0.3<br>(0.2-0.4)              | 0.2<br>(0.1-0.2) <sup>a</sup> |
| Postpartum or obstetric AE*               | 0.2<br>(0.2-0.3) | 0.2<br>(0.2-0.3)              | 0.1<br>(0.1-0.2) <sup>a</sup> | 0.3<br>(0.2-0.4)              |
| Neurological AE                           | 0.1<br>(0.1-0.2) | 0.0<br>(0.0-0.1)              | 0.1<br>(0.0-0.1)              | 0.1<br>(0.1-0.2)              |

AE: adverse event; CI: 95% confidence interval; \*not corrected for the proportion of women in the studied population; <sup>a</sup>significant differences compared to 2013.

1  
2  
3 Figure 1. The proportion of admissions with adverse events (AEs) every month from 2013–  
4 2016.  
5  
6  
7

8 Figure 2. Proportion of admissions with preventable and non-preventable adverse events  
9 (AEs) in younger and older patients from 2013–2016.  
10  
11  
12

13 Figure 3. The proportion of admissions with preventable and non-preventable adverse events  
14 (AEs) in patients with acute admissions, patients who underwent surgery and patients treated  
15 ‘off-site’ from 2015–2016  
16  
17  
18  
19

20 Figure 4. Length of stay (mean, 95% CI) in two age groups of men and women for admissions  
21 without adverse events, with non-preventable adverse events and with preventable adverse  
22 events from 2013–2016.  
23  
24  
25  
26  
27  
28  
29  
30  
31  
32  
33  
34  
35  
36  
37  
38  
39  
40  
41  
42  
43  
44  
45  
46  
47  
48  
49  
50  
51  
52  
53  
54  
55  
56  
57  
58  
59  
60

Table S1. Example of a trigger, its definition and clarifying text.

**Deep vein thrombosis or pulmonary embolism**

|                                                               |                                                                                                                                                                                                                                                                                                                                                                                                                                                                                                                                                                                                                   |
|---------------------------------------------------------------|-------------------------------------------------------------------------------------------------------------------------------------------------------------------------------------------------------------------------------------------------------------------------------------------------------------------------------------------------------------------------------------------------------------------------------------------------------------------------------------------------------------------------------------------------------------------------------------------------------------------|
| <b>Definition</b>                                             | <b>Deep vein thrombosis or pulmonary embolism diagnosed during hospital care and not apparent on admission</b>                                                                                                                                                                                                                                                                                                                                                                                                                                                                                                    |
| <b>Check for</b>                                              | Venous catheter (central venous catheter, subcutaneous venous port, etc.), recent surgery, immobilisation, obesity, cancer or cancer treatment increases the risk. Has thrombosis prophylaxis been given according to routines?                                                                                                                                                                                                                                                                                                                                                                                   |
| <b>Harm that can be found</b>                                 | Transient or permanent reduction of cardiac or pulmonary function, reduced venous circulation in the lower extremities with oedema and reduced function                                                                                                                                                                                                                                                                                                                                                                                                                                                           |
| <b>Preventability</b>                                         | <p>Deep vein thrombosis should be regarded as preventable if:</p> <ul style="list-style-type: none"> <li><input type="checkbox"/> Prophylaxis against thrombosis has not been given according to routines.</li> <li><input type="checkbox"/> Increased risk following immobilisation has not been considered, for example, after surgery.</li> <li><input type="checkbox"/> Anticoagulation therapy (e.g., warfarin) has not been adequately controlled.</li> </ul> <p>Pulmonary embolus should also be regarded as avoidable if signs of deep vein thrombosis have not been adequately observed and treated.</p> |
| <b>Relevant codes for diagnosis, treatment and medication</b> | ICD-10-code:<br>I82 (Embolus and thrombosis)<br>I26 (Pulmonary embolus)<br>O88.2 (Obstetric embolus due to thrombosis)                                                                                                                                                                                                                                                                                                                                                                                                                                                                                            |
| <b>Results associated to this trigger</b>                     | Results from investigation with ultrasound, CT or phlebography. Results from pulmonary scintigraphy (ventilation and perfusion scintigraphy).                                                                                                                                                                                                                                                                                                                                                                                                                                                                     |

Figure 1. The proportion of admissions with adverse events (AEs) every month from 2013–2016.

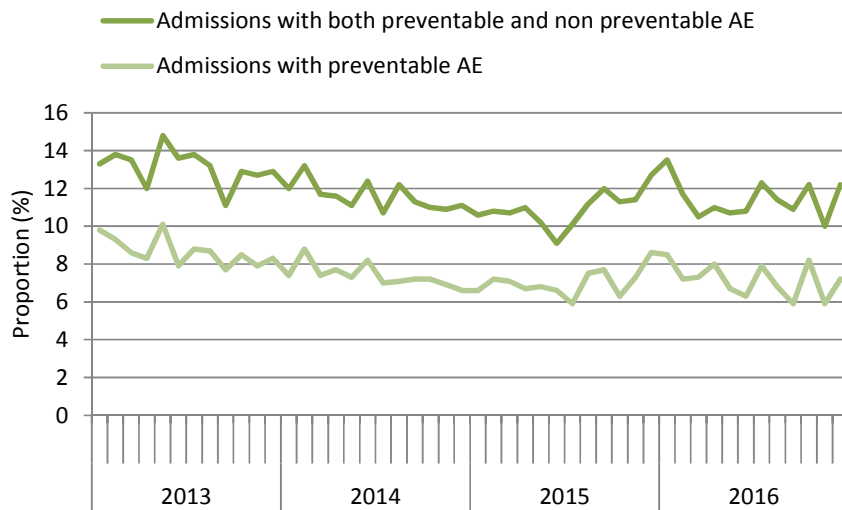

Peer review only

Figure 2. Proportion of admissions with preventable and non-preventable adverse events (AEs) in younger and older patients from 2013–2016.

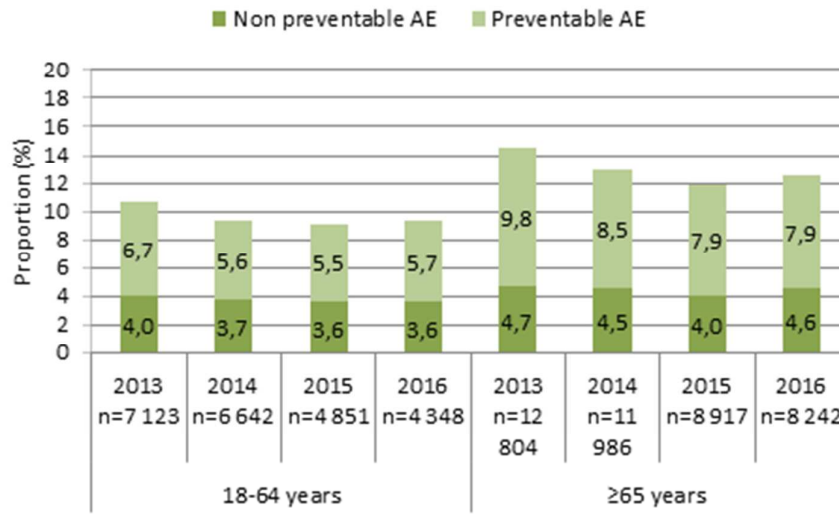

Figure 3. The proportion of admissions with preventable and non-preventable adverse events (AEs) in patients with acute admissions, patients who underwent surgery and patients treated 'off-site' from 2015–2016

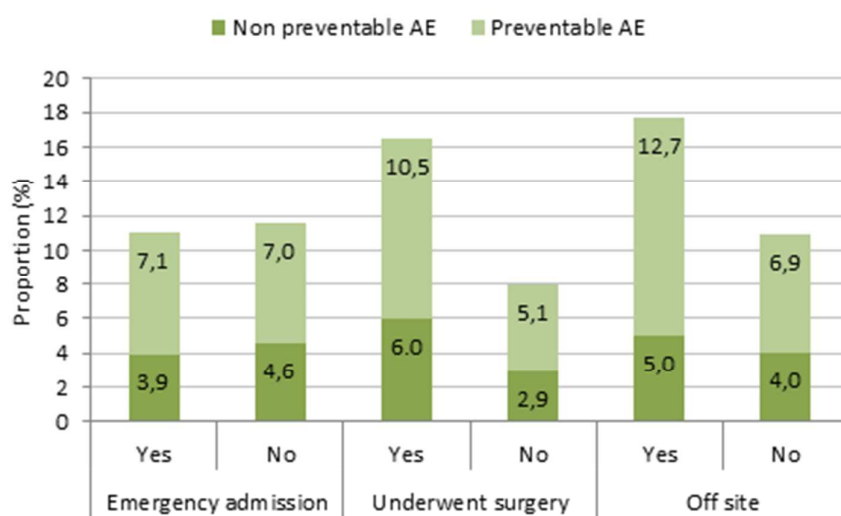



Figure 4. Length of stay (mean, 95% CI) in two age groups of men and women for admissions without adverse events, with non-preventable adverse events and with preventable adverse events from 2013–2016.

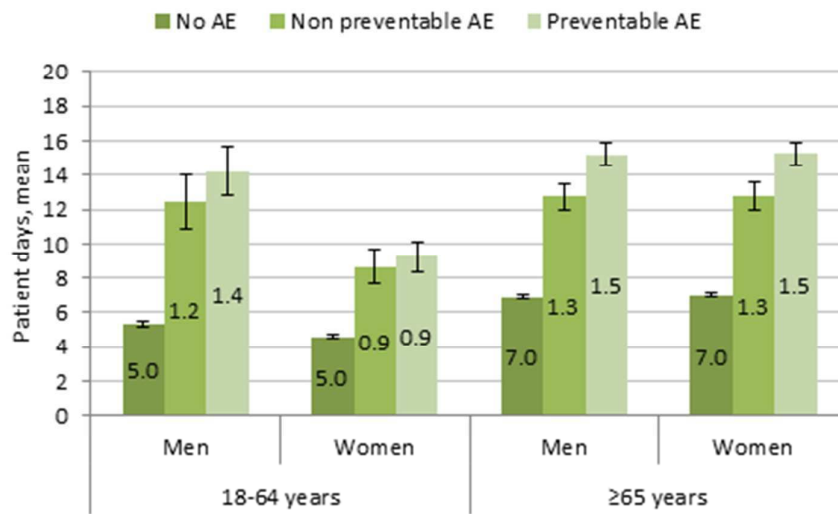

Table S1. Example of a trigger, its definition and clarifying text.

**Deep vein thrombosis or pulmonary embolism**

|                                                               |                                                                                                                                                                                                                                                                                                                                                                                                                                                                                                                                                                                                                   |
|---------------------------------------------------------------|-------------------------------------------------------------------------------------------------------------------------------------------------------------------------------------------------------------------------------------------------------------------------------------------------------------------------------------------------------------------------------------------------------------------------------------------------------------------------------------------------------------------------------------------------------------------------------------------------------------------|
| <b>Definition</b>                                             | <b>Deep vein thrombosis or pulmonary embolism diagnosed during hospital care and not apparent on admission</b>                                                                                                                                                                                                                                                                                                                                                                                                                                                                                                    |
| <b>Check for</b>                                              | Venous catheter (central venous catheter, subcutaneous venous port, etc.), recent surgery, immobilisation, obesity, cancer or cancer treatment increases the risk. Has thrombosis prophylaxis been given according to routines?                                                                                                                                                                                                                                                                                                                                                                                   |
| <b>Harm that can be found</b>                                 | Transient or permanent reduction of cardiac or pulmonary function, reduced venous circulation in the lower extremities with oedema and reduced function                                                                                                                                                                                                                                                                                                                                                                                                                                                           |
| <b>Preventability</b>                                         | <p>Deep vein thrombosis should be regarded as preventable if:</p> <ul style="list-style-type: none"> <li><input type="checkbox"/> Prophylaxis against thrombosis has not been given according to routines.</li> <li><input type="checkbox"/> Increased risk following immobilisation has not been considered, for example, after surgery.</li> <li><input type="checkbox"/> Anticoagulation therapy (e.g., warfarin) has not been adequately controlled.</li> </ul> <p>Pulmonary embolus should also be regarded as avoidable if signs of deep vein thrombosis have not been adequately observed and treated.</p> |
| <b>Relevant codes for diagnosis, treatment and medication</b> | ICD-10-code:<br>I82 (Embolus and thrombosis)<br>I26 (Pulmonary embolus)<br>O88.2 (Obstetric embolus due to thrombosis)                                                                                                                                                                                                                                                                                                                                                                                                                                                                                            |
| <b>Results associated to this trigger</b>                     | Results from investigation with ultrasound, CT or phlebography. Results from pulmonary scintigraphy (ventilation and perfusion scintigraphy).                                                                                                                                                                                                                                                                                                                                                                                                                                                                     |

**STROBE 2007 (v4) Statement—Checklist of items that should be included in reports of *cohort studies***

| Section/Topic             | Item # | Recommendation                                                                                                                                                                       | Reported on page # |
|---------------------------|--------|--------------------------------------------------------------------------------------------------------------------------------------------------------------------------------------|--------------------|
| Title and abstract        | 1      | (a) Indicate the study’s design with a commonly used term in the title or the abstract                                                                                               | #1, #2             |
|                           |        | (b) Provide in the abstract an informative and balanced summary of what was done and what was found                                                                                  | #2                 |
| <b>Introduction</b>       |        |                                                                                                                                                                                      |                    |
| Background/rationale      | 2      | Explain the scientific background and rationale for the investigation being reported                                                                                                 | #4                 |
| Objectives                | 3      | State specific objectives, including any prespecified hypotheses                                                                                                                     | #4                 |
| <b>Methods</b>            |        |                                                                                                                                                                                      |                    |
| Study design              | 4      | Present key elements of study design early in the paper                                                                                                                              | #5-6               |
| Setting                   | 5      | Describe the setting, locations, and relevant dates, including periods of recruitment, exposure, follow-up, and data collection                                                      | #4-6               |
| Participants              | 6      | (a) Give the eligibility criteria, and the sources and methods of selection of participants. Describe methods of follow-up                                                           | #5-6               |
|                           |        | (b) For matched studies, give matching criteria and number of exposed and unexposed                                                                                                  |                    |
| Variables                 | 7      | Clearly define all outcomes, exposures, predictors, potential confounders, and effect modifiers. Give diagnostic criteria, if applicable                                             | #6                 |
| Data sources/ measurement | 8*     | For each variable of interest, give sources of data and details of methods of assessment (measurement). Describe comparability of assessment methods if there is more than one group | #6                 |
| Bias                      | 9      | Describe any efforts to address potential sources of bias                                                                                                                            | #6                 |
| Study size                | 10     | Explain how the study size was arrived at                                                                                                                                            | #5                 |
| Quantitative variables    | 11     | Explain how quantitative variables were handled in the analyses. If applicable, describe which groupings were chosen and why                                                         | #7                 |
| Statistical methods       | 12     | (a) Describe all statistical methods, including those used to control for confounding                                                                                                | #7                 |
|                           |        | (b) Describe any methods used to examine subgroups and interactions                                                                                                                  | NA                 |
|                           |        | (c) Explain how missing data were addressed                                                                                                                                          | NA                 |
|                           |        | (d) If applicable, explain how loss to follow-up was addressed                                                                                                                       | NA                 |
|                           |        | (e) Describe any sensitivity analyses                                                                                                                                                | NA                 |
| <b>Results</b>            |        |                                                                                                                                                                                      |                    |

|                          |     |                                                                                                                                                                                                              |        |
|--------------------------|-----|--------------------------------------------------------------------------------------------------------------------------------------------------------------------------------------------------------------|--------|
| Participants             | 13* | (a) Report numbers of individuals at each stage of study—eg numbers potentially eligible, examined for eligibility, confirmed eligible, included in the study, completing follow-up, and analysed            | NA     |
|                          |     | (b) Give reasons for non-participation at each stage                                                                                                                                                         | NA     |
|                          |     | (c) Consider use of a flow diagram                                                                                                                                                                           | NA     |
| Descriptive data         | 14* | (a) Give characteristics of study participants (eg demographic, clinical, social) and information on exposures and potential confounders                                                                     |        |
|                          |     | (b) Indicate number of participants with missing data for each variable of interest                                                                                                                          | #7     |
|                          |     | (c) Summarise follow-up time (eg, average and total amount)                                                                                                                                                  | NA     |
| Outcome data             | 15* | Report numbers of outcome events or summary measures over time                                                                                                                                               | NA     |
| Main results             | 16  | (a) Give unadjusted estimates and, if applicable, confounder-adjusted estimates and their precision (eg, 95% confidence interval). Make clear which confounders were adjusted for and why they were included |        |
|                          |     | (b) Report category boundaries when continuous variables were categorized                                                                                                                                    | #7-9   |
|                          |     | (c) If relevant, consider translating estimates of relative risk into absolute risk for a meaningful time period                                                                                             | NA     |
| Other analyses           | 17  | Report other analyses done—eg analyses of subgroups and interactions, and sensitivity analyses                                                                                                               | #9     |
| <b>Discussion</b>        |     |                                                                                                                                                                                                              |        |
| Key results              | 18  | Summarise key results with reference to study objectives                                                                                                                                                     | #10    |
| <b>Limitations</b>       |     |                                                                                                                                                                                                              |        |
| Interpretation           | 20  | Give a cautious overall interpretation of results considering objectives, limitations, multiplicity of analyses, results from similar studies, and other relevant evidence                                   | #10-11 |
| Generalisability         | 21  | Discuss the generalisability (external validity) of the study results                                                                                                                                        | #12    |
| <b>Other information</b> |     |                                                                                                                                                                                                              |        |
| Funding                  | 22  | Give the source of funding and the role of the funders for the present study and, if applicable, for the original study on which the present article is based                                                | #3     |

\*Give information separately for cases and controls in case-control studies and, if applicable, for exposed and unexposed groups in cohort and cross-sectional studies.

**Note:** An Explanation and Elaboration article discusses each checklist item and gives methodological background and published examples of transparent reporting. The STROBE checklist is best used in conjunction with this article (freely available on the Web sites of PLoS Medicine at <http://www.plosmedicine.org/>, Annals of Internal Medicine at <http://www.annals.org/>, and Epidemiology at <http://www.epidem.com/>). Information on the STROBE Initiative is available at [www.strobe-statement.org](http://www.strobe-statement.org).

# BMJ Open

## Adverse events in Sweden during 2013–2016 - implementation of a national trigger tool and a review of 65 000 hospital admissions.

|                                    |                                                                                                                                                                                                                                                                                                                                                                                                                                 |
|------------------------------------|---------------------------------------------------------------------------------------------------------------------------------------------------------------------------------------------------------------------------------------------------------------------------------------------------------------------------------------------------------------------------------------------------------------------------------|
| Journal:                           | <i>BMJ Open</i>                                                                                                                                                                                                                                                                                                                                                                                                                 |
| Manuscript ID                      | bmjopen-2017-020833.R1                                                                                                                                                                                                                                                                                                                                                                                                          |
| Article Type:                      | Research                                                                                                                                                                                                                                                                                                                                                                                                                        |
| Date Submitted by the Author:      | 08-Feb-2018                                                                                                                                                                                                                                                                                                                                                                                                                     |
| Complete List of Authors:          | Nilsson, Lena; Region Ostergotland, Anesthesia and Intensive care<br>Risberg , Madeleine ; Linköping Region Östergötland, Unit for Health<br>Analysis<br>Soop, Michael; National Board of Health and Welfare, Sweden,<br>Nylen, Urban; The National Board of Health and Welfare<br>Ålenius, Carina; Swedish Association of Local Authorities and Regions<br>Rutberg, Hans; Swedish Association of Local Authorities and Regions |
| <b>Primary Subject<br>Heading</b>: | Health services research                                                                                                                                                                                                                                                                                                                                                                                                        |
| Secondary Subject Heading:         | Epidemiology                                                                                                                                                                                                                                                                                                                                                                                                                    |
| Keywords:                          | Adverse event, Patient harm, Patient safety, Trigger tool                                                                                                                                                                                                                                                                                                                                                                       |
|                                    |                                                                                                                                                                                                                                                                                                                                                                                                                                 |

SCHOLARONE™  
Manuscripts

Only

1  
2  
3 Adverse events in Sweden during 2013–2016 - implementation of a  
4 national trigger tool and a review of 65 000 hospital admissions.  
5  
6  
7

8 Lena Nilsson,<sup>1</sup> Madeleine Borgstedt-Risberg,<sup>2</sup> Michael Soop,<sup>3</sup> Urban Nylén,<sup>3</sup> Carina Ålenius<sup>4</sup>  
9 and Hans Rutberg<sup>4</sup>  
10  
11  
12

13 <sup>1</sup>Department of Anaesthesiology and Intensive Care, Department of Medical and Health  
14 Sciences, Faculty of Medicine and Health Science, Linköping University, Linköping,  
15 Sweden; <sup>2</sup>Centre for Organisational Support and Development (CVU), Region Östergötland,  
16 Linköping University, Linköping, Sweden; <sup>3</sup>National Board of Health and Welfare,  
17 Stockholm, Sweden; <sup>4</sup>Swedish Association of Local Authorities and Regions, Stockholm,  
18 Sweden  
19  
20  
21  
22  
23  
24  
25

26 Corresponding author:  
27

28 Lena Nilsson  
29

30 Department of Anaesthesiology and Intensive Care  
31

32 University Hospital  
33

34 583 81 Linköping  
35

36 Phone: +46(0)10 103 18 38  
37

38 [lana.nilsson@regionostergotland.se](mailto:lana.nilsson@regionostergotland.se)  
39

40 Word count: 3211  
41  
42  
43  
44  
45  
46  
47  
48  
49  
50  
51  
52  
53  
54  
55  
56  
57  
58  
59  
60

## Abstract

**Objectives:** To describe the implementation of a trigger tool in Sweden and present the national incidence of adverse events (AEs) over a 4-year period during which an ongoing national patient safety initiative was terminated.

**Design:** Cohort study using retrospective record review based on a trigger tool methodology.

**Setting and participants:** Patients  $\geq 18$  years admitted to all somatic acute care hospitals in Sweden from 2013–2016 were randomised into the study.

**Primary and secondary outcome measures:** Primary outcome measure was the incidence of AEs, and secondary measures were type of injury, severity of harm, preventability of AEs, estimated healthcare cost of AEs and incidence of AEs in patients cared for in another type of unit than the one specialised for their medical needs ('off-site').

**Results:** In a review of 64 917 admissions, the average AE rates in 2014 (11.6%), 2015 (10.9%) and 2016 (11.4%) were significantly lower than in 2013 (13.1%). The decrease in the AE rates was seen in different age groups, in both genders and for preventable and non-preventable AEs. The decrease comprised only the least severe AEs. The types of AEs that decreased were hospital-acquired infections, urinary bladder distention and compromised vital signs. Patients cared for 'off-site' had 84% more preventable AEs than patients cared for in the appropriate units. The cost of increased length of stay associated with preventable AEs corresponded to 13–14% of the total cost of somatic hospital care in Sweden.

**Conclusions:** The rate of AEs in Swedish somatic hospitals has decreased from 2013 to 2016. Retrospective record review can be used to monitor patient safety over time, to assess the effects of national patient safety interventions and analyse challenges to patient safety such as the increasing care of patients 'off-site'. It was found that the economic burden of preventable AEs is high.

**Keywords:** Adverse event, Patient harm, Patient safety, Trigger tool

### Strengths and limitations of this study

- The study includes all somatic acute care hospitals in Sweden, except for paediatric units.
- This is a longitudinal study over a 4-year period during which an ongoing national patient safety initiative was terminated.
- An estimation of the economic cost for prolonged hospital stay due to preventable AEs was undertaken.
- The trigger tool and the national database were adaptive to new triggers and trends in healthcare, thus showing the ability to evaluate new patient safety risks.
- Inherent weaknesses in a retrospective record review are poor documentation quality and the risk of hindsight bias.

### Funding statement

This work was supported by the Swedish Association of Local Authorities and Regions by creating and hosting a national database for the reporting of data from the record reviews.

### Competing interests

The authors declare that they have no competing interests.

### Author's contribution

LN, MB-R, MS, UN, CÅ and HR designed and conducted the study. MB-R statistically analysed the data. HR, UN and CÅ undertook the initial interpretation of the data, which was followed by discussions with all the authors. LN and HR drafted the initial version of the manuscript, which was followed by a critical revision process of the intellectual content involving all the authors. All the authors agreed to the final version of the manuscript before submission. All authors agreed to be accountable for the accuracy of any part of the work.

### Data sharing statement

No additional data are available.



## Introduction

Retrospective medical record review (RRR) is an established and validated method to identify adverse events (AEs).<sup>1-4</sup> The method gives an overview of the incidence, nature, preventability and consequences of AEs. This information can be used in systematic quality improvement work to reduce the incidence of AEs. RRR is superior to clinical incident reporting systems for detecting AEs.<sup>3</sup> A list of criteria (triggers) that indicate a higher probability of AEs may be used to identify details in the record that indicate the presence of AEs. The Institute for Healthcare Improvement (IHI) in the US combined topic- and location-specific trigger tools into one Global Trigger Tool (GTT),<sup>5</sup> which is one of the most commonly used trigger tools. Translated and adapted versions of the GTT are available in, for example, Sweden, Denmark, Norway, Germany, Italy and the UK. Although GTT is considered relevant for measuring AEs at the national level, to the best of our knowledge, only Norway and Sweden have used the methodology for this purpose.<sup>6,7</sup>

The present study describes the implementation of a trigger tool in Sweden, including the development of a national database that covers reviews from all acute care hospitals save for paediatric and psychiatric care. We also present the national yearly incidence of AEs over a 4-year period (2013–2016) and estimate the cost of preventable AEs.

## Methods

### *Implementation of the Swedish trigger tool*

The first national handbook for record review was published in 2008. It was based on the IHI-GTT version 2007, which was translated and adapted to a Swedish context. The Swedish handbook included a six-graded preventability scale used in a national survey on AEs initiated by The National Board of Health and Welfare.<sup>8</sup> The trigger tool methodology gradually spread over the country, and in 2011, hospitals in approximately half of the country's 21 regions used the method.

In 2012, a national group of experienced reviewers, in collaboration with a reference group of reviewers, patient safety experts and researchers in the trigger tool field, revised the national handbook.<sup>9</sup> The work was initiated and financed by the Swedish Association of Local Authorities and Regions (SALAR) as part of a national patient safety initiative. The number of triggers was reduced from 53 to 44 based on the fact that the removed triggers seldom pointed to AEs or were not possible to identify in the review. Others were merged together

1  
2  
3 and renamed. Ten new triggers were added based on local review teams' findings and  
4 research pointing to these common AEs. An example of a new trigger added was urinary  
5 bladder distension.<sup>10,11</sup> Review teams were educated in all regions in a coordinated effort  
6 within a national patient safety initiative, which promoted and financially rewarded record  
7 review. This contributed to the rapid use of the method by all somatic acute care hospitals.  
8  
9  
10

### 11 12 *National patient safety initiative and database*

13  
14 Launched by the Swedish government and SALAR, a national initiative to increase patient  
15 safety took place from 2011–2014. The initiative involved financial incentives and included,  
16 among other things, safer use of drugs, prevention of resistance to antibiotics, reduction of  
17 hospital-acquired infections and measurement of the patient safety culture. As a result of the  
18 national initiative, by 2013, all somatic hospitals involved in acute care (n=63) undertook  
19 monthly reviews of patient records to determine the rate and nature of AEs. A database was  
20 developed by SALAR in 2012, and in this database, the review results from each hospital  
21 were entered. These included hospital type, medical speciality, the patient's gender, age and  
22 length of hospital stay and the type, severity and preventability of AEs. The monthly reviews  
23 continued after the termination of the national patient safety initiative in December 2014, and  
24 by December 2016, the database included almost 65 000 admissions.  
25  
26  
27  
28  
29  
30  
31  
32

33 The database was expanded in 2015 to include information on risk factors for AEs, such as  
34 acute admission, surgical intervention and care provided in another type of unit other than the  
35 one specialised for the patient's medical needs ('off-site').  
36  
37  
38  
39

### 40 *Inclusion criteria and sampling*

41 From 2013–2014, the minimum monthly number of randomly selected admissions reviewed  
42 was 40 for university hospitals, 30 for the central county council hospitals and 20 for the  
43 county hospitals.<sup>5</sup> From 2015 and onward, the number of reviewed records was reduced by  
44 50%. Somatic hospital admissions from patients aged 18 years or older with a hospital stay of  
45 at least 24 hours were eligible for inclusion. All records from the whole period of  
46 hospitalisation were reviewed, which sometimes included more than one type of department.  
47  
48  
49  
50  
51  
52

### 53 *Review process*

1  
2  
3 Each hospital had its own review team. The review teams consisted of one or two nurses and  
4 at least one physician. All team members were senior level, had special training in the record  
5 review method and had an interest and knowledge in the field of patient safety. The team  
6 members often represented different medical specialties.  
7  
8

9  
10 A nurse first screened the records for the presence of triggers and possible AEs. In the second  
11 review stage, the team assessed the occurrence of AEs. All AEs were categorised according to  
12 type, severity and preventability using the national handbook. The physician made the final  
13 decisions. There was no assessment of interrater reliability.  
14  
15  
16

### 17 18 19 ***Categorisation of adverse events***

20 An AE was defined as an unintended physical injury resulting from or contributed to by  
21 medical care that required additional monitoring, treatment or hospitalisation or that resulted  
22 in death. An AE was categorised into one of 16 different types (see results). A hospital-  
23 acquired infection was defined as either an infection associated with previous in-hospital  
24 treatment or an infection occurring 48 hours after hospitalisation or within 48 hours after  
25 discharge from the hospital. Each AE could only be categorised into one type.  
26  
27  
28  
29

30  
31 AEs were categorised into one of five severity categories, per the National Coordination  
32 Council for Medication Error Reporting and Prevention index: Category E: contributed to or  
33 resulted in temporary harm and required intervention; Category F: contributed to or resulted  
34 in temporary harm requiring outpatient care, readmission or prolonged hospital care; Category  
35 G: contributed to or caused permanent patient harm; Category H: event that required  
36 lifesaving intervention within 60 minutes and Category I: contributed to the patient's death.  
37  
38  
39  
40  
41

42  
43 An AE was categorised as being preventable or not by using a graded scale of four options: 1.  
44 The AE was 'not preventable'; 2. 'probably not preventable'; 3. 'probably preventable'; and  
45 4. 'certainly preventable'. The handbook gives detailed instructions concerning the difficult  
46 assessment of preventability (Supplementary table S1). AEs categorised as 1 and 2 are  
47 denoted as non-preventable, and AEs categorised as 3 and 4 are denoted as preventable in the  
48 following text and figures.  
49  
50  
51  
52  
53  
54  
55  
56  
57  
58  
59  
60

### ***Statistics***

Data are presented as number (percent), median (range), mean (SD) or mean (95% CI). Comparison of the proportions between two groups was made by chi-squared test and between more than two groups by Z-test with Bonferroni adjustment. Confidence intervals were calculated using a normal distribution approximation. A p-value <0.05 was considered significant. All statistical calculations were made using SPSS Version 22, IBM, New York, United States.

### ***Ethics***

The study was conducted in compliance with the Declaration of Helsinki (World Medical Association, 2013), and because it was a part of quality improvement initiatives in the hospitals, an approval from an ethical committee was not necessary. The principles published in the national ethical guidelines for research were followed (SFS 2003:460). Names and personal identification numbers were not collected or entered into the database.

### **Results**

#### ***Results of GTT 2013–2016***

A total of 64 917 admissions were reviewed in 59–63 hospitals during the years 2013–2016. The number of hospitals decreased over the period because two of the minor hospitals stopped reviewing, and two merged with another hospital (Table 1). From the beginning of 2013 to the middle of 2015, there was a continuous decline in the average monthly rates of admissions with AEs and preventable AEs (Figure 1). During the second half of 2015, the rates of AEs increased slightly and subsequently stabilised.

The proportion of admissions with preventable AEs decreased significantly between 2013 and the years 2014, 2015 and 2016, respectively. No significant differences were seen between the other years (Table 1).

The decrease in the AE rate can largely be attributed to a reduction in the least severe AEs (Category E) (Table 2). The types of AEs that decreased significantly were hospital-acquired infections, urinary bladder distention, compromised vital signs and ‘other’ (Table 3). The latter group included allergic reaction, haemorrhage not related to surgery, venous thrombosis or pulmonary embolus, superficial blood vessel or skin harm, anaesthetic-related AE and any

1  
2  
3 other AE. Among the hospital-acquired infections, there were significant reductions in the  
4 rate of admissions with pneumonia, ventilator-associated pneumonia and 'other infections'.  
5  
6

7  
8 When aggregating data for the years 2013–2016, 11.4% of the AEs were categorised as 'not  
9 preventable', 27.2% as 'probably not preventable', 39.4% as 'probably preventable', and  
10 22.0% as 'certainly preventable'. Consequently, 61.4% of the AEs were judged to be  
11 preventable (probably and certainly preventable). The types of AEs considered most  
12 preventable were pressure ulcer (91%) and urinary bladder distention (88%). The  
13 corresponding preventability rates were for hospital-acquired infections (60%), fall injuries  
14 (60%), AEs caused by surgery or invasive procedures (56%), 'other' (54%), drug-related AE  
15 (46%), compromised vital signs (41%), neurological AE (38%) and postpartum or obstetric  
16 AE (41%).  
17  
18  
19  
20  
21  
22

23  
24 AEs were more common in patients aged 65 years or older than in patients 18–64 years of age  
25 ( $p<0.001$ ). The number of admissions with AEs decreased between 2013 and 2016 in the  
26 younger ( $P=0.02$ ) and older patient groups ( $p<0.001$ ) (Figure 2). The reductions were  
27 significant also for the 'preventable AEs' (younger  $p=0.05$ , older  $p<0.001$ ).  
28  
29  
30

31  
32 When aggregating data for the years 2013–2016, men had a significantly higher rate of  
33 admissions with AEs than women (12.5% vs. 11.5%,  $p<0.001$ ). Men had significantly higher  
34 rates of hospital-acquired infections and urinary bladder distention. From aggregated data  
35 2013-2016, when stratifying the older age group into three groups (65-74, 75-84 and  $\geq 85$   
36 years) the rate of AEs were 12.0%, 13.2% and 14.3%, respectively. The difference was  
37 significant between the group 65-74 years and the two older age groups ( $p=0.02$  and  
38  $p<0.0001$ , respectively).  
39  
40  
41  
42  
43

44  
45 Aggregated data for 2015–2016 showed that the incidence of preventable AEs was almost  
46 100% higher in patients who had undergone surgery or another invasive procedure ( $n=9584$ ;  
47  $p<0.001$ ) and approximately 84% higher in patients treated in another unit than the unit  
48 specialised to their medical needs ('off-site') ( $n=984$ ;  $p<0.001$ ). No difference in AE rates  
49 was found between acute and planned admissions ( $p=0.72$ ) (Figure 3).  
50  
51  
52  
53  
54  
55

1  
2  
3 Acute admissions were more common in males compared to women (80.5% vs. 78.5%,  
4  $p=0.001$ ) and in patients aged 65 years or older compared to patients under 65 years of age  
5 (82.2% vs. 73.7%,  $p<0.001$ ). The proportion of admissions where the patient underwent  
6 surgery or another invasive procedure did not differ between the genders. In patients who had  
7 surgery, the rate of AEs was higher in acute admissions than in planned admissions (19.1%  
8 vs. 13.1%,  $p<0.001$ ).  
9  
10  
11  
12

13  
14 The proportion of patients cared for 'off-site' increased from 3.1% in 2015 to 4.5% in 2016  
15 ( $p<0.001$ ). Patients aged 65 years or older were more often treated 'off-site' than younger  
16 patients (4.1% vs. 3.1%,  $p<0.001$ ). No differences related to gender were observed. The most  
17 common type of AEs in patients cared for 'off-site' were hospital-acquired infections (36.0%)  
18 and 'other' (19.8%), which includes skin injury, superficial vessel injury and vein thrombosis  
19 or pulmonary embolism.  
20  
21  
22  
23  
24

25 The mean (SD) length of hospital stay (LOS) in aggregated data for 2013–2016 was 7.1 (8.1)  
26 days. LOS for the admissions without AEs was 6.2 (6.6) days while admissions with  
27 preventable AEs was 14.2 (14.5) days. A significantly longer LOS in patients with AEs was  
28 seen in both age groups of both men and women (Figure 4). The LOS was significantly longer  
29 in older patients ( $\geq 65$  years) than in younger (18–64 years) both for patients with and without  
30 AEs. When stratifying the older age group into three groups (65–74, 75–84 and  $\geq 85$  years) no  
31 difference was seen between these three groups in LOS among patients with preventable AEs.  
32  
33  
34  
35  
36  
37

38 The mean difference in LOS between hospital stays without AEs and those with preventable  
39 AEs was 8 days. The average incidence of preventable AEs (2013–2016) was 8%, and the  
40 average number of hospital admissions per year was almost 1.4 million. Accordingly, it can  
41 be estimated that preventable AEs affected some 110 000 hospital admissions per year and  
42 were associated with 880 000 extra days of hospitalisation. With the mean cost for 1 day of  
43 hospitalisation being approximately 10 000 SEK, the annual cost for preventable AEs can be  
44 estimated at 880 million euros. This corresponds to approximately 13–14% of the total cost of  
45 adult somatic hospital care in Sweden. During 2015 and 2016, approximately 13 000 records  
46 were reviewed yearly. The estimated annual total cost for record review was 0.4–0.5 million  
47 euros.  
48  
49  
50  
51  
52  
53  
54  
55  
56  
57  
58  
59  
60

### ***National feedback of the results based on GTT***

Regular yearly reports from SALAR described the development of AE rates on an aggregated national level. Also, specific reports for surgical care,<sup>12</sup> orthopaedic care,<sup>13</sup> obstetrics and gynaecology<sup>14</sup> and hospital-acquired infections<sup>15</sup> were published. The mapping of AEs is an important basis for improvement work. In 2016, SALAR published an inventory of all patient safety initiatives undertaken by hospitals or departments based on the record review findings. The prominent areas for the 268 different improvement initiatives were pressure ulcers, education of patient safety experts, falls, healthcare-associated infections, urinary bladder distension, surgical harm and compromised vital signs.

### **Discussion**

From our nationwide review of almost 65 000 randomly selected admissions to acute care hospitals, we have shown there was a reduction in the rate of AEs between 2013 and 2014, 2015 and 2016, respectively. However, a gradual decrease in the rate of admissions with AEs was seen from 2013 until mid-2015; thereafter, the AE rate rose to, and stabilised at, a slightly higher level. The initial gradual decrease in AE rate could reflect the focus on patient safety promoted by the national patient safety initiative. The decrease in the rate of AEs continued 6 months after the termination of the initiative (2014), which may indicate that the effect of the 4-year long initiative persisted for a short period after it was terminated. The subsequent broken trend after the termination of the patient safety initiative may reflect the hospital leadership shifting their focus and a subsequent decrease in the efforts to reduce the rate of AEs. Conceivably, other factors not related to the initiative may have influenced the trends seen in the AE rates. The higher proportion of patients treated 'off-site' 2016 compared to 2015 might explain to some extent the increase in the rates of AEs.

The study has some strengths. To our knowledge, the current study is the largest published trigger tool study, including all somatic acute hospitals in Sweden, save for paediatric and psychiatric care. Also, the current study covers a substantial period of time. The revision of the trigger tool made it possible to add triggers found to indicate AEs that were not included in the initial IHI tool, for example, urinary bladder distension, and the national database enabled a continuous systematic, but also flexible, collection of data because we were able to add administrative data that enabled the detection of safety risks connected to trends in healthcare, for example, increasing 'off-site' care. The trigger tool has high specificity, high



1  
2  
3 reliability, is more sensitive than other methods,<sup>16,17</sup> and large-scale implementations of the  
4 GTT including modifications have been successful in other studies.<sup>6,18,19</sup>  
5  
6

7  
8 In retrospective record review studies, a potential weakness is poor documentation quality,  
9 which means only documented AEs can be identified. The true number of AEs and even  
10 premature death is thus probably higher than found only by RRR.<sup>20</sup> Postdischarge patient  
11 interviews have shown that even serious AEs are not documented in the record and that AEs  
12 that not occur in close proximity to hospital stay might go unnoticed.<sup>21</sup> An example is a  
13 forgotten vaccination against pneumococcal infection in connection with splenectomy that  
14 may give a serious infection decades later. Direct observation of care is another way of  
15 detecting AEs not captured by a record review.<sup>22</sup> Another weakness is the risk of hindsight  
16 bias when assessing the preventability of AEs. Two-thirds of the AEs were classified as  
17 'probably preventable' or 'probably not preventable', which illustrates the difficulty in  
18 determining preventability with certainty. A further limitation is that we did not assess inter-  
19 rater reliability. The reason is that as the record reviews were part of a national patient safety  
20 initiative with the primary focus on changes in AE rates of individual hospitals and not for  
21 comparisons inbetween hospitals. The number of reviewed admissions from university  
22 hospitals, central county council hospitals and small hospitals does not fully reflect the true  
23 proportion of admissions to these hospital categories. Because the rates of AEs differ between  
24 hospital types, this must be taken into account when estimating the true national average rate  
25 of AEs. When doing so, the national rates of AEs presented in this paper increase by  
26 approximately 10%.  
27  
28  
29  
30  
31  
32  
33  
34  
35  
36  
37  
38  
39

40 We have demonstrated an increased rate of AEs in patients cared for in another type of unit  
41 other than the one specialised for their medical needs. The main reason why patients are cared  
42 for 'off-site' is a shortage of available beds due to lack of nurses. Actions need to be taken to  
43 reduce the number of 'off-site' patients.  
44  
45  
46  
47

48 As shown earlier,<sup>23</sup> a hospital-acquired infection is the most common type of AE, and its  
49 incidence fell during the study period. Evidence-based programs to prevent central venous  
50 catheter-associated infections, postoperative wound infections and urinary tract infections  
51 were promoted nationally during the study period. This was carried out by conducting a  
52 continuous follow-up on compliance to basic hygiene rules and dress code on a department  
53  
54  
55  
56  
57  
58  
59  
60



1  
2  
3 level. Conceivably, the promotion of measures to reduce the incidence of hospital-acquired  
4 infections during the patient safety initiative was successful and resulted in a reduction of  
5 infection rates.  
6  
7

8  
9 Urinary bladder distention was most often regarded as preventable, and the rates decreased  
10 over time. This could in part be because of the use of a stricter definition after 2013, but this  
11 problem was extensively addressed by physicians as well as nursing organisations. The  
12 decrease in the rates of compromised vital signs could reflect an increased use of vital sign  
13 checks, such as the modified early warning score (MEWS)<sup>24</sup> and rapid response teams.<sup>25</sup>  
14  
15  
16  
17

18  
19 The higher incidence of AEs found among men can partly be attributed to their higher rates of  
20 hospital-acquired infections and urinary bladder distension. The reason behind the former  
21 remains to be explained. Another explanation is that the present study included gynaecology  
22 and obstetrics, where AE rates are lower than in other medical disciplines.<sup>26</sup>  
23  
24  
25  
26

27 The suffering associated with patient harm for the patients, relatives and involved personnel is  
28 high but cannot easily be quantified. There is also an economic burden associated with patient  
29 harm, both on healthcare and society. The golden standard to estimate the financial cost of  
30 AEs for healthcare is considered to be retrospective record review.<sup>27</sup> Our estimate, based  
31 solely on the costs of prolonged LOS, is in line with a recent report that suggested that 15% of  
32 hospital expenditures in Organisation for Economic Co-operation and Development (OECD)  
33 countries relate to AEs.<sup>28</sup> These entail additional treatment and diagnostic procedures,  
34 (re)admission to hospital and a prolonged hospital stay. In line with our finding, the OECD  
35 report estimated that 6–8 additional days are spent in the hospital for patients having an AE.<sup>26</sup>  
36 With a longer LOS, it is probable that patients are more exposed to AEs. Regrettably, we did  
37 not collect data on day of occurrence of AEs. However, our group has previously shown that  
38 AEs most often occur early during the hospital stay or cause the hospitalisation.<sup>29</sup> The OECD  
39 report<sup>28</sup> emphasises that the costs for preventive actions are substantially lower than the costs  
40 of AEs.  
41  
42  
43  
44  
45  
46  
47  
48  
49  
50

51 To our knowledge, Norway and Sweden are the only countries so far that has evaluated the  
52 effect of a national patient safety initiative using monthly assessments of AE rates based on  
53 GTT. Accordingly, some 40 000 hospital admissions were reviewed during the Norwegian  
54  
55  
56

1  
2  
3 patient safety campaign, and AE rates decreased from 16.1% (2011) to 13.0% (2013).<sup>6</sup> The  
4 rates and types of AEs in Norway and Sweden in 2013 have been shown to be similar.<sup>7</sup>  
5  
6

7  
8 In conclusion, AE rates in Swedish somatic acute care hospitals decreased between 2013 and  
9 2014, 2015 and 2016, respectively. Retrospective record review is a useful method to monitor  
10 patient safety over time and to assess the effects of national patient safety interventions. Off-  
11 site care of patients is becoming more common. This increases the incidence of AEs and is a  
12 challenge to patient safety. The economic burden of preventable AEs is high.  
13  
14  
15  
16  
17  
18  
19  
20  
21  
22  
23  
24  
25  
26  
27  
28  
29  
30  
31  
32  
33  
34  
35  
36  
37  
38  
39  
40  
41  
42  
43  
44  
45  
46  
47  
48  
49  
50  
51  
52  
53  
54  
55  
56  
57  
58  
59  
60

For peer review only

## References

1. Naessens JM, Campbell CR, Huddleston JM, et al. A comparison of hospital adverse events identified by three widely used detection methods. *Int J Qual Health Care* 2009;21:301–7.
2. Christiaans-Dingelhoff I, Smits M, Zwaan L, et al. To what extent are adverse events found in patient records reported by patients and healthcare professionals via complaints, claims and incident reports? *BMC Health Serv Res* 2011;11:49.
3. Classen David C, Resar R, Griffin F, et al. "Global Trigger Tool" shows that adverse events in hospitals may be ten times greater than previously measured. *Health Aff* 2011;30:581–9.
4. Unbeck M, Muren O, Lillkrona U. Identification of adverse events at an orthopaedics department in Sweden. *Acta Orthop* 2008;79:396–403.
5. Griffin FA, Resar RK. IHI Global Trigger Tool for measuring adverse events. IHI Innovation Series white paper. Cambridge, Massachusetts: Institute for Healthcare Improvement; 2007.
6. Deilkås ET, Bukholm G, Lindstrom JC, et al. Monitoring adverse events in Norwegian hospitals from 2010 to 2013. *BMJ Open* 2015;5:e008576.
7. Deilkås ET, Risberg MB, Haugen M, et al. Exploring similarities and differences in hospital adverse event rates between Norway and Sweden using Global Trigger Tool. *BMJ Open* 2017;7:e012492.
8. Soop M, Fryksmark U, Köster M, et al. The incidence of adverse events in Swedish hospitals: a retrospective medical record review study. *Int J Qual Health Care* 2009;21:285–91.
9. Markörbaserad Journalgranskning för att identifiera och mäta skador i vården [in Swedish]. Sveriges kommuner och Landsting: ETC kommunikation; 2012:ISBN: 978-917-164-847.
10. Unbeck M, Dalen N, Muren O, et al.. Healthcare processes must be improved to reduce the occurrence of orthopaedic adverse events. *Scand J Caring Sci*. 2010;24:671–7.
11. Joelsson-Alm E, Nyman CR, Lindholm C, et al. Perioperative bladder distension: a prospective study. *Scand J Urol Nephrol*. 2009;43:58-62.

- 1  
2  
3 12. Nilsson L, Risberg MB, Montgomery A, et al. Preventable adverse events in surgical care  
4 in Sweden: a nationwide review of patient notes. *Medicine (Baltimore)* 2016;95:e3047.  
5  
6  
7 13. Rutberg H, Borgstedt-Risberg M, Gustafson P, et al. Adverse events in orthopedic care  
8 identified via the Global Trigger Tool in Sweden—implications on preventable prolonged  
9 hospitalizations. *Patient Saf Surg.* 2016;10:23.  
10  
11  
12 14. Skador i vården- skadefrekvens och skadepanorama för obstetric och gynekologi (In  
13 Swedish) [http://lof.se/wp-content/uploads/Skador-i-vården-skadefrekvens-och-](http://lof.se/wp-content/uploads/Skador-i-vården-skadefrekvens-och-skadepanorama-för-obstetrik-och-gynekologi.pdf)  
14 [skadepanorama-för-obstetrik-och-gynekologi.pdf](http://lof.se/wp-content/uploads/Skador-i-vården-skadefrekvens-och-skadepanorama-för-obstetrik-och-gynekologi.pdf) (Accessed Sept 2017)  
15  
16  
17  
18 15. Vårdrelaterade infektioner. Kunskap, konsekvenser, kostnader (In Swedish). ISBN: 978-  
19 91-7585-475-5 <http://webbutik.skl.se/bilder/artiklar/pdf/7585-475-5.pdf?issuusl=ignore>  
20 (Accessed Sept 2017)  
21  
22  
23  
24 16. Sharek PJ, Parry G, Goldmann D, et al. Performance characteristics of a methodology to  
25 quantify adverse events over time in hospitalized patients. *Health Serv Res.* 2011;46:654–78.  
26  
27  
28 17. Naessens JM, O'Byrne TJ, Johnson MG, et al. Measuring hospital adverse events:  
29 assessing inter-rater reliability and trigger performance of the Global Trigger Tool. *Int J Qual*  
30 *Health Care.* 2010;22:266–74.  
31  
32  
33  
34 18. Good VS, Saldaña M, Gilder R, et al. Large-scale deployment of the Global Trigger Tool  
35 across a large hospital system: refinements for the characterisation of adverse events to  
36 support patient safety learning opportunities. *BMJ Qual Saf.* 2011;20:25–30.  
37  
38  
39  
40 19. Garrett PR Jr, Sammer C, Nelson A, et al. Developing and implementing a standardized  
41 process for global trigger tool application across a large health system. *Jt Comm J Qual*  
42 *Patient Saf.* 2013;39:292–7.  
43  
44  
45  
46 20. James JT. A new evidence-based estimate of patient harms associated with hospital care.  
47 *J Patient Saf* 2013;9: 122Y128.  
48  
49  
50  
51 21. Weissman JS, Schneider EC, Weingart SN, et al. Comparing patient-reported hospital  
52 adverse events with medical record review: do patients know something that hospitals do not?  
53 *Ann Intern Med.* 200;149:100-8.  
54  
55  
56  
57  
58  
59  
60

- 1  
2  
3 22. Flynn EA, Barker KN, Pepper GA, Bates DW, Mikeal RL. Comparison of methods for  
4 detecting medication errors in 36 hospitals and skilled-nursing facilities. *Am J Health Syst*  
5 *Pharm.* 2002;59:436-46.23. Hibbert PD, Molloy CJ, Hooper TD, et al. The application of the  
6 Global Trigger Tool: a systematic review. *Int J Qual Health Care* 2016;28:640–9.  
7  
8  
9  
10 24. Smith ME, Chiovaro JC, O'Neil M, et al. Early warning system scores for clinical  
11 deterioration in hospitalized patients: a systematic review. *Ann Am Thorac Soc.*  
12 2014;11:1454-65.  
13  
14  
15 25. Solomon RS, Corwin GS, Barclay DC, et al. Effectiveness of rapid response teams on  
16 rates of in-hospital cardiopulmonary arrest and mortality: a systematic review and meta-  
17 analysis. *J Hosp Med.* 2016;11:438–45.  
18  
19  
20 26. Leape LL, Brennan TA, Laird N, et al. The nature of adverse events in hospitalized  
21 patients — results of the Harvard Medical Practice Study II. *N Engl J Med.* 1991;324:377–  
22 384.  
23  
24  
25 27. Jackson T. One dollar in seven: Scoping the Economics of Patient Safety. *The Canadian*  
26 *Patient Safety Institute* 2009;  
27 [http://www.patientsafetyinstitute.ca/en/toolsResources/Research/commissionedResearch/Eco-](http://www.patientsafetyinstitute.ca/en/toolsResources/Research/commissionedResearch/EconomicsofPatientSafety/Documents/Economics%20of%20Patient%20Safety%20Literature%20Review.pdf)  
28 [nomicsofPatientSafety/Documents/Economics%20of%20Patient%20Safety%20Literature%20](http://www.patientsafetyinstitute.ca/en/toolsResources/Research/commissionedResearch/EconomicsofPatientSafety/Documents/Economics%20of%20Patient%20Safety%20Literature%20Review.pdf)  
29 [Review.pdf](http://www.patientsafetyinstitute.ca/en/toolsResources/Research/commissionedResearch/EconomicsofPatientSafety/Documents/Economics%20of%20Patient%20Safety%20Literature%20Review.pdf) (Accessed Sept 2017)  
30  
31  
32  
33  
34 28. Slawomirski L, Aaraaen A, Klazinga N. The economics of patient safety: strengthening a  
35 value-based approach to reducing patient harm at national level. OECD, Directorate for  
36 Employment, Labour and Social Affairs; 2017.  
37  
38  
39 29. Rutberg H, Borgstedt Risberg M, Sjö Dahl R, et al. Characterisations of adverse events  
40 detected in a university hospital: a 4-year study using the Global Trigger Tool method. *BMJ*  
41 *Open.* 2014;4:e004879.  
42  
43  
44  
45  
46  
47

### 48 **Acknowledgments**

49 The authors are grateful for the contribution from all review teams.  
50  
51  
52  
53  
54  
55  
56  
57  
58  
59  
60

Table 1. The number of hospitals and admissions, demographics and the proportion of admissions with adverse events and preventable adverse events

|                                                  | 2013                          | 2014                          | 2015                          | 2016                          |
|--------------------------------------------------|-------------------------------|-------------------------------|-------------------------------|-------------------------------|
| Number of hospitals                              | 63                            | 63                            | 62                            | 59                            |
| Number of admissions                             | 19 927                        | 18 629                        | 13 771                        | 12 590                        |
| Age (median (range)), years                      | 71 (18-105)                   | 71 (18-109)                   | 71 (18-108)                   | 72 (18-105)                   |
| Men, percent                                     | 46,8                          | 46,0                          | 47,1                          | 48,0                          |
| Admissions with AEs, percent (95%CI)             | 13.1 (12.7-13.6) <sup>a</sup> | 11.6 (11.2-12.1) <sup>a</sup> | 10.9 (10.4-11.4) <sup>a</sup> | 11.4 (10.9-12.0) <sup>a</sup> |
| Admissions with preventable AEs, percent (95%CI) | 8.7 (8.3-9.1) <sup>a</sup>    | 7.4 (7.1-7.8) <sup>a</sup>    | 7.0 (6.6-7.4) <sup>a</sup>    | 7.2 (6.7-7.6) <sup>a</sup>    |

AE: adverse event; CI: 95% confidence interval; <sup>a</sup>significant differences compared to 2013

Table 2. Proportion (percent (95%CI)) of admissions with adverse events classified according to severity

|                                                                                                                   | 2013             | 2014                          | 2015                          | 2016                          |
|-------------------------------------------------------------------------------------------------------------------|------------------|-------------------------------|-------------------------------|-------------------------------|
| <b>Severity</b>                                                                                                   |                  |                               |                               |                               |
| E: contributed to or resulted in temporary harm and required intervention                                         | 7.40 (7.03-7.77) | 6.08 (5.73-6.42) <sup>a</sup> | 5.50 (5.12-5.89) <sup>a</sup> | 5.99 (5.57-6.40) <sup>a</sup> |
| F: contributed to or resulted in temporary harm requiring outpatient care, readmission or prolonged hospital care | 6.15 (5.81-6.48) | 5.84 (5.50-6.18)              | 5.74 (5.36-6.13)              | 5.76 (5.35-6.17)              |
| G: contributed to or caused permanent patient harm                                                                | 0.41 (0.32-0.50) | 0.27 (0.20-0.35)              | 0.29 (0.20-0.38)              | 0.38 (0.27-0.49)              |
| H: event that required lifesaving intervention required within 60 minutes                                         | 0.09 (0.05-0.13) | 0.08 (0.04-0.12)              | 0.12 (0.06-0.17)              | 0.10 (0.04-0.15)              |
| I: contributed to the patient's death                                                                             | 0.31 (0.23-0.38) | 0.23 (0.16-0.29)              | 0.23 (0.15-0.31)              | 0.24 (0.15-0.32)              |

AE: adverse event; CI: 95% confidence interval; <sup>a</sup>significant differences compared to 2013.

Table 3. Proportion (percent (95 % CI)) of admissions with adverse events classified according to type

|                                           | 2013             | 2014                          | 2015                          | 2016                          |
|-------------------------------------------|------------------|-------------------------------|-------------------------------|-------------------------------|
| <b>Type</b>                               |                  |                               |                               |                               |
| Hospital-acquired infection               | 5.2<br>(4.9-5.5) | 4.6<br>(4.3-4.9) <sup>a</sup> | 4.5<br>(4.1-4.8) <sup>a</sup> | 4.3<br>(4.0-4.7) <sup>a</sup> |
| Infection other                           | 1.4<br>(1.2-1.6) | 1.0<br>(0.8-1.1) <sup>a</sup> | 1.1<br>(0.9-1.3)              | 0.9<br>(0.8-1.1) <sup>a</sup> |
| Urinary tract infection                   | 1.4<br>(1.3-1.6) | 1.5<br>(1.4-1.7)              | 1.3<br>(1.1-1.5)              | 1.3<br>(1.1-1.5)              |
| Postoperative wound infection             | 1.2<br>(1.1-1.4) | 1.2<br>(1.0-1.3)              | 1.1<br>(0.9-1.2)              | 1.1<br>(0.9-1.3)              |
| Pneumonia                                 | 0.7<br>(0.6-0.8) | 0.5<br>(0.4-0.6) <sup>a</sup> | 0.5<br>(0.4-0.6) <sup>a</sup> | 0.5<br>(0.4-0.6) <sup>a</sup> |
| Sepsis                                    | 0.5<br>(0.4-0.6) | 0.3<br>(0.3-0.4) <sup>a</sup> | 0.4<br>(0.3-0.6)              | 0.5<br>(0.4-0.6)              |
| Central venous line infection             | 0.2<br>(0.1-0.2) | 0.1<br>(0.0-0.1)              | 0.1<br>(0.0-0.1)              | 0.1<br>(0.0-0.2)              |
| Ventilator associated pneumonia           | 0.1<br>(0.1-0.2) | 0.0<br>(0.0-0.1) <sup>a</sup> | 0.1<br>(0.0-0.1)              | 0.1<br>(0.0-0.1) <sup>a</sup> |
| Clostridium difficile infection           | -                | 0.3<br>(0.2-0.3)              | 0.3<br>(0.2-0.3)              | 0.3<br>(0.2-0.3)              |
| Other                                     | 2.7<br>(2.5-3.0) | 2.4<br>(2.2-2.7)              | 2.0<br>(1.8-2.3) <sup>a</sup> | 2.2<br>(2.0-2.5) <sup>a</sup> |
| AEs caused by surgery/invasive procedures | 1.9<br>(1.7-2.1) | 1.8<br>(1.6-2.0)              | 1.8<br>(1.6-2.0)              | 1.6<br>(1.4-1.8)              |
| Urinary bladder distention                | 1.7<br>(1.5-1.9) | 1.0<br>(0.9-1.2) <sup>a</sup> | 1.0<br>(0.9-1.2) <sup>a</sup> | 1.1<br>(0.9-1.3) <sup>a</sup> |
| Drug-related AE                           | 1.4<br>(1.3-1.6) | 1.4<br>(1.2-1.6)              | 1.3<br>(1.1-1.5)              | 1.5<br>(1.3-1.7)              |
| Pressure ulcer (grade 2-4)                | 1.1<br>(1.0-1.3) | 1.0<br>(0.9-1.1)              | 1.2<br>(1.0-1.4)              | 1.3<br>(1.1-1.5)              |
| Fall injury                               | 0.8<br>(0.7-0.9) | 0.9<br>(0.7-1.0)              | 0.7<br>(0.5-0.8)              | 0.7<br>(0.6-0.9)              |
| Compromised vital signs                   | 0.5<br>(0.4-0.6) | 0.3<br>(0.2-0.3) <sup>a</sup> | 0.3<br>(0.2-0.4)              | 0.2<br>(0.1-0.2) <sup>a</sup> |
| Postpartum or obstetric AE*               | 0.2<br>(0.2-0.3) | 0.2<br>(0.2-0.3)              | 0.1<br>(0.1-0.2) <sup>a</sup> | 0.3<br>(0.2-0.4)              |
| Neurological AE                           | 0.1<br>(0.1-0.2) | 0.0<br>(0.0-0.1)              | 0.1<br>(0.0-0.1)              | 0.1<br>(0.1-0.2)              |

AE: adverse event; CI: 95% confidence interval; \*not corrected for the proportion of women in the studied population; <sup>a</sup>significant differences compared to 2013.

1  
2  
3 Figure 1. The proportion of admissions with adverse events (AEs) every month from 2013–  
4 2016.  
5  
6  
7

8 Figure 2. Proportion of admissions with preventable and non-preventable adverse events  
9 (AEs) in younger and older patients from 2013–2016.  
10  
11

12  
13 Figure 3. The proportion of admissions with preventable and non-preventable adverse events  
14 (AEs) in patients with acute admissions, patients who underwent surgery and patients treated  
15 ‘off-site’ from 2015–2016  
16  
17  
18

19  
20 Figure 4. Length of stay (mean, 95% CI) in two age groups of men and women for admissions  
21 without adverse events, with non-preventable adverse events and with preventable adverse  
22 events from 2013–2016.  
23  
24  
25  
26  
27  
28  
29  
30  
31  
32  
33  
34  
35  
36  
37  
38  
39  
40  
41  
42  
43  
44  
45  
46  
47  
48  
49  
50  
51  
52  
53  
54  
55  
56  
57  
58  
59  
60



Table S1. Example of a trigger, its definition and clarifying text.

**Deep vein thrombosis or pulmonary embolism**

|                                                               |                                                                                                                                                                                                                                                                                                                                                                                                                                                                                                                                                                                                                   |
|---------------------------------------------------------------|-------------------------------------------------------------------------------------------------------------------------------------------------------------------------------------------------------------------------------------------------------------------------------------------------------------------------------------------------------------------------------------------------------------------------------------------------------------------------------------------------------------------------------------------------------------------------------------------------------------------|
| <b>Definition</b>                                             | <b>Deep vein thrombosis or pulmonary embolism diagnosed during hospital care and not apparent on admission</b>                                                                                                                                                                                                                                                                                                                                                                                                                                                                                                    |
| <b>Check for</b>                                              | Venous catheter (central venous catheter, subcutaneous venous port, etc.), recent surgery, immobilisation, obesity, cancer or cancer treatment increases the risk. Has thrombosis prophylaxis been given according to routines?                                                                                                                                                                                                                                                                                                                                                                                   |
| <b>Harm that can be found</b>                                 | Transient or permanent reduction of cardiac or pulmonary function, reduced venous circulation in the lower extremities with oedema and reduced function                                                                                                                                                                                                                                                                                                                                                                                                                                                           |
| <b>Preventability</b>                                         | <p>Deep vein thrombosis should be regarded as preventable if:</p> <ul style="list-style-type: none"> <li><input type="checkbox"/> Prophylaxis against thrombosis has not been given according to routines.</li> <li><input type="checkbox"/> Increased risk following immobilisation has not been considered, for example, after surgery.</li> <li><input type="checkbox"/> Anticoagulation therapy (e.g., warfarin) has not been adequately controlled.</li> </ul> <p>Pulmonary embolus should also be regarded as avoidable if signs of deep vein thrombosis have not been adequately observed and treated.</p> |
| <b>Relevant codes for diagnosis, treatment and medication</b> | ICD-10-code:<br>I82 (Embolus and thrombosis)<br>I26 (Pulmonary embolus)<br>O88.2 (Obstetric embolus due to thrombosis)                                                                                                                                                                                                                                                                                                                                                                                                                                                                                            |
| <b>Results associated to this trigger</b>                     | Results from investigation with ultrasound, CT or phlebography. Results from pulmonary scintigraphy (ventilation and perfusion scintigraphy).                                                                                                                                                                                                                                                                                                                                                                                                                                                                     |

1  
2  
3  
4  
5  
6  
7  
8  
9  
10  
11  
12  
13  
14  
15  
16  
17  
18  
19  
20  
21  
22  
23  
24  
25  
26  
27  
28  
29  
30  
31  
32  
33  
34  
35  
36  
37  
38  
39  
40  
41  
42  
43  
44  
45  
46  
47  
48  
49  
50  
51  
52  
53  
54  
55  
56  
57  
58  
59  
60

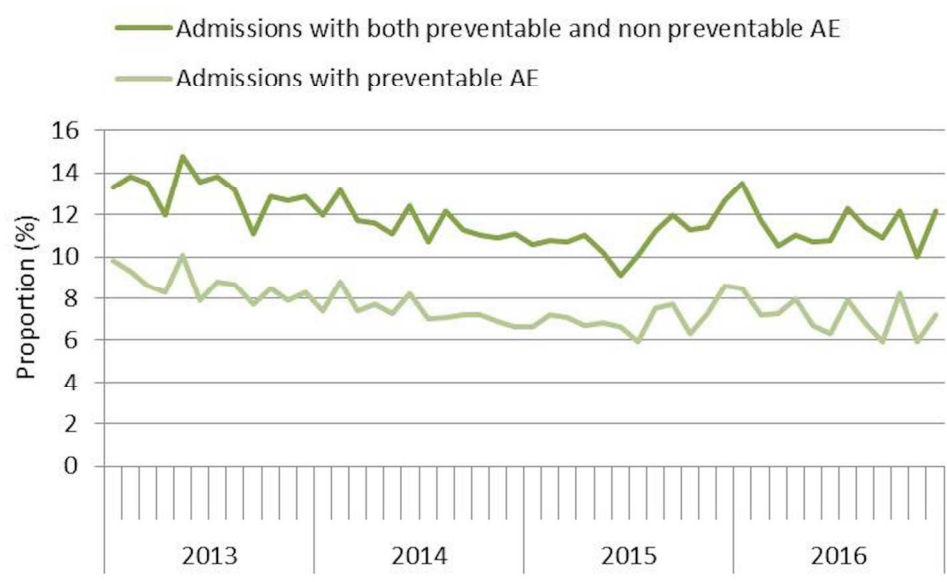

Figure 1. The proportion of admissions with adverse events (AEs) every month from 2013–2016.

127x76mm (300 x 300 DPI)

Review only

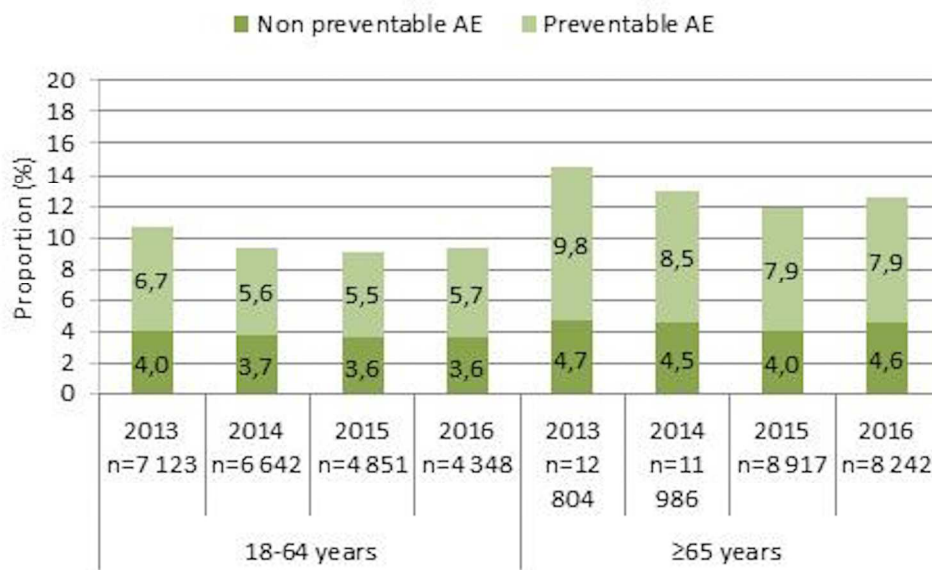

Figure 2. Proportion of admissions with preventable and non-preventable adverse events (AEs) in younger and older patients from 2013–2016.

127x76mm (300 x 300 DPI)

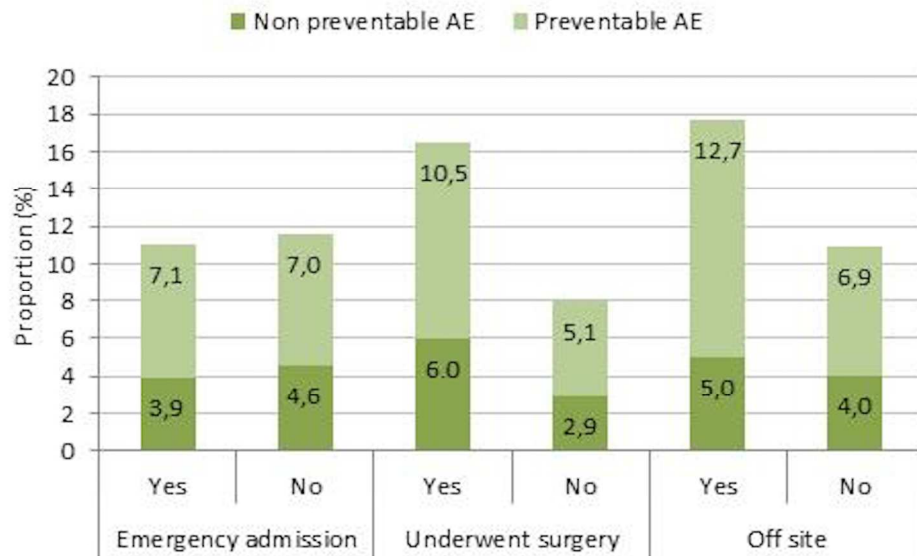

Figure 3. The proportion of admissions with preventable and non-preventable adverse events (AEs) in patients with acute admissions, patients who underwent surgery and patients treated 'off-site' from 2015-2016

129x79mm (300 x 300 DPI)

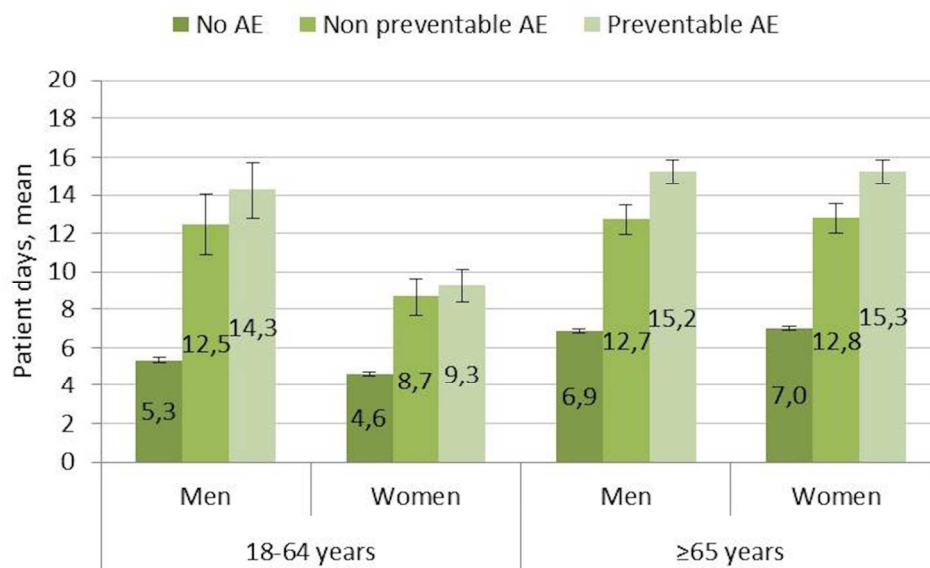

Figure 4. Length of stay (mean, 95% CI) in two age groups of men and women for admissions without adverse events, with non-preventable adverse events and with preventable adverse events from 2013-2016.

127x76mm (300 x 300 DPI)

Table S1. Example of a trigger, its definition and clarifying text.

**Deep vein thrombosis or pulmonary embolism**

|                                                               |                                                                                                                                                                                                                                                                                                                                                                                                                                                                                                                                                                                                                  |
|---------------------------------------------------------------|------------------------------------------------------------------------------------------------------------------------------------------------------------------------------------------------------------------------------------------------------------------------------------------------------------------------------------------------------------------------------------------------------------------------------------------------------------------------------------------------------------------------------------------------------------------------------------------------------------------|
| <b>Definition</b>                                             | <b>Deep vein thrombosis or pulmonary embolism diagnosed during hospital care and not apparent on admission</b>                                                                                                                                                                                                                                                                                                                                                                                                                                                                                                   |
| <b>Check for</b>                                              | Venous catheter (central venous catheter, subcutaneous venous port, etc.), recent surgery, immobilisation, obesity, cancer or cancer treatment increases the risk. Has thrombosis prophylaxis been given according to routines?                                                                                                                                                                                                                                                                                                                                                                                  |
| <b>Harm that can be found</b>                                 | Transient or permanent reduction of cardiac or pulmonary function, reduced venous circulation in the lower extremities with oedema and reduced function                                                                                                                                                                                                                                                                                                                                                                                                                                                          |
| <b>Preventability</b>                                         | <p>Deep vein thrombosis should be regarded as preventable if:</p> <ul style="list-style-type: none"> <li><input type="checkbox"/> Prophylaxis against thrombosis has not been given according to routines.</li> <li><input type="checkbox"/> Increased risk following immobilisation has not been considered, for example, after surgery.</li> <li><input type="checkbox"/> Anticoagulation therapy (e.g. warfarin) has not been adequately controlled.</li> </ul> <p>Pulmonary embolus should also be regarded as avoidable if signs of deep vein thrombosis have not been adequately observed and treated.</p> |
| <b>Relevant codes for diagnosis, treatment and medication</b> | ICD-10-code:<br>I82 (Embolus and thrombosis)<br>I26 (Pulmonary embolus)<br>O88.2 (Obstetric embolus due to thrombosis)                                                                                                                                                                                                                                                                                                                                                                                                                                                                                           |
| <b>Results associated to this trigger</b>                     | Results from investigation with ultrasound, CT or phlebography. Results from pulmonary scintigraphy (ventilation and perfusion scintigraphy).                                                                                                                                                                                                                                                                                                                                                                                                                                                                    |

**STROBE 2007 (v4) Statement—Checklist of items that should be included in reports of *cohort studies***

| Section/Topic                | Item # | Recommendation                                                                                                                                                                       | Reported on page # |
|------------------------------|--------|--------------------------------------------------------------------------------------------------------------------------------------------------------------------------------------|--------------------|
| Title and abstract           | 1      | (a) Indicate the study's design with a commonly used term in the title or the abstract                                                                                               | #1, #2             |
|                              |        | (b) Provide in the abstract an informative and balanced summary of what was done and what was found                                                                                  | #2                 |
| <b>Introduction</b>          |        |                                                                                                                                                                                      |                    |
| Background/rationale         | 2      | Explain the scientific background and rationale for the investigation being reported                                                                                                 | #4                 |
| Objectives                   | 3      | State specific objectives, including any prespecified hypotheses                                                                                                                     | #4                 |
| <b>Methods</b>               |        |                                                                                                                                                                                      |                    |
| Study design                 | 4      | Present key elements of study design early in the paper                                                                                                                              | #5-6               |
| Setting                      | 5      | Describe the setting, locations, and relevant dates, including periods of recruitment, exposure, follow-up, and data collection                                                      | #4-6               |
| Participants                 | 6      | (a) Give the eligibility criteria, and the sources and methods of selection of participants. Describe methods of follow-up                                                           | #5-6               |
|                              |        | (b) For matched studies, give matching criteria and number of exposed and unexposed                                                                                                  |                    |
| Variables                    | 7      | Clearly define all outcomes, exposures, predictors, potential confounders, and effect modifiers. Give diagnostic criteria, if applicable                                             | #6                 |
| Data sources/<br>measurement | 8*     | For each variable of interest, give sources of data and details of methods of assessment (measurement). Describe comparability of assessment methods if there is more than one group | #6                 |
| Bias                         | 9      | Describe any efforts to address potential sources of bias                                                                                                                            | #6                 |
| Study size                   | 10     | Explain how the study size was arrived at                                                                                                                                            | #5                 |
| Quantitative variables       | 11     | Explain how quantitative variables were handled in the analyses. If applicable, describe which groupings were chosen and why                                                         | #7                 |
| Statistical methods          | 12     | (a) Describe all statistical methods, including those used to control for confounding                                                                                                | #7                 |
|                              |        | (b) Describe any methods used to examine subgroups and interactions                                                                                                                  | NA                 |
|                              |        | (c) Explain how missing data were addressed                                                                                                                                          | NA                 |
|                              |        | (d) If applicable, explain how loss to follow-up was addressed                                                                                                                       | NA                 |
|                              |        | (e) Describe any sensitivity analyses                                                                                                                                                | NA                 |
| <b>Results</b>               |        |                                                                                                                                                                                      |                    |

|                          |     |                                                                                                                                                                                                              |        |
|--------------------------|-----|--------------------------------------------------------------------------------------------------------------------------------------------------------------------------------------------------------------|--------|
| Participants             | 13* | (a) Report numbers of individuals at each stage of study—eg numbers potentially eligible, examined for eligibility, confirmed eligible, included in the study, completing follow-up, and analysed            | NA     |
|                          |     | (b) Give reasons for non-participation at each stage                                                                                                                                                         | NA     |
|                          |     | (c) Consider use of a flow diagram                                                                                                                                                                           | NA     |
| Descriptive data         | 14* | (a) Give characteristics of study participants (eg demographic, clinical, social) and information on exposures and potential confounders                                                                     |        |
|                          |     | (b) Indicate number of participants with missing data for each variable of interest                                                                                                                          | #7     |
|                          |     | (c) Summarise follow-up time (eg, average and total amount)                                                                                                                                                  | NA     |
| Outcome data             | 15* | Report numbers of outcome events or summary measures over time                                                                                                                                               | NA     |
| Main results             | 16  | (a) Give unadjusted estimates and, if applicable, confounder-adjusted estimates and their precision (eg, 95% confidence interval). Make clear which confounders were adjusted for and why they were included |        |
|                          |     | (b) Report category boundaries when continuous variables were categorized                                                                                                                                    | #7-9   |
|                          |     | (c) If relevant, consider translating estimates of relative risk into absolute risk for a meaningful time period                                                                                             | NA     |
| Other analyses           | 17  | Report other analyses done—eg analyses of subgroups and interactions, and sensitivity analyses                                                                                                               | #9     |
| <b>Discussion</b>        |     |                                                                                                                                                                                                              |        |
| Key results              | 18  | Summarise key results with reference to study objectives                                                                                                                                                     | #10    |
| <b>Limitations</b>       |     |                                                                                                                                                                                                              |        |
| Interpretation           | 20  | Give a cautious overall interpretation of results considering objectives, limitations, multiplicity of analyses, results from similar studies, and other relevant evidence                                   | #10-11 |
| Generalisability         | 21  | Discuss the generalisability (external validity) of the study results                                                                                                                                        | #12    |
| <b>Other information</b> |     |                                                                                                                                                                                                              |        |
| Funding                  | 22  | Give the source of funding and the role of the funders for the present study and, if applicable, for the original study on which the present article is based                                                | #3     |

\*Give information separately for cases and controls in case-control studies and, if applicable, for exposed and unexposed groups in cohort and cross-sectional studies.

**Note:** An Explanation and Elaboration article discusses each checklist item and gives methodological background and published examples of transparent reporting. The STROBE checklist is best used in conjunction with this article (freely available on the Web sites of PLoS Medicine at <http://www.plosmedicine.org/>, Annals of Internal Medicine at <http://www.annals.org/>, and Epidemiology at <http://www.epidem.com/>). Information on the STROBE Initiative is available at [www.strobe-statement.org](http://www.strobe-statement.org).



# BMJ Open

## Incidence of adverse events in Sweden during 2013–2016: a cohort study describing the implementation of a national trigger tool.

|                                 |                                                                                                                                                                                                                                                                                                                                                                                                                              |
|---------------------------------|------------------------------------------------------------------------------------------------------------------------------------------------------------------------------------------------------------------------------------------------------------------------------------------------------------------------------------------------------------------------------------------------------------------------------|
| Journal:                        | <i>BMJ Open</i>                                                                                                                                                                                                                                                                                                                                                                                                              |
| Manuscript ID                   | bmjopen-2017-020833.R2                                                                                                                                                                                                                                                                                                                                                                                                       |
| Article Type:                   | Research                                                                                                                                                                                                                                                                                                                                                                                                                     |
| Date Submitted by the Author:   | 20-Feb-2018                                                                                                                                                                                                                                                                                                                                                                                                                  |
| Complete List of Authors:       | Nilsson, Lena; Region Ostergotland, Anesthesia and Intensive care<br>Risberg , Madeleine ; Linköping Region Östergötland, Unit for Health Analysis<br>Soop, Michael; National Board of Health and Welfare, Sweden,<br>Nylen, Urban; The National Board of Health and Welfare<br>Ålenius, Carina; Swedish Association of Local Authorities and Regions<br>Rutberg, Hans; Swedish Association of Local Authorities and Regions |
| <b>Primary Subject Heading</b>: | Health services research                                                                                                                                                                                                                                                                                                                                                                                                     |
| Secondary Subject Heading:      | Epidemiology                                                                                                                                                                                                                                                                                                                                                                                                                 |
| Keywords:                       | Adverse event, Patient harm, Patient safety, Trigger tool                                                                                                                                                                                                                                                                                                                                                                    |
|                                 |                                                                                                                                                                                                                                                                                                                                                                                                                              |

SCHOLARONE™  
Manuscripts

Only

1  
2  
3 Incidence of adverse events in Sweden during 2013–2016: a cohort  
4 study describing the implementation of a national trigger tool .  
5  
6  
7

8 Lena Nilsson,<sup>1</sup> Madeleine Borgstedt-Risberg,<sup>2</sup> Michael Soop,<sup>3</sup> Urban Nylén,<sup>3</sup> Carina Ålenius<sup>4</sup>  
9 and Hans Rutberg<sup>4</sup>  
10  
11  
12

13 <sup>1</sup>Department of Anaesthesiology and Intensive Care, Department of Medical and Health  
14 Sciences, Faculty of Medicine and Health Science, Linköping University, Linköping,  
15 Sweden; <sup>2</sup>Centre for Organisational Support and Development (CVU), Region Östergötland,  
16 Linköping University, Linköping, Sweden; <sup>3</sup>National Board of Health and Welfare,  
17 Stockholm, Sweden; <sup>4</sup>Swedish Association of Local Authorities and Regions, Stockholm,  
18 Sweden  
19  
20  
21  
22  
23  
24  
25

26 Corresponding author:  
27

28 Lena Nilsson  
29

30 Department of Anaesthesiology and Intensive Care  
31

32 University Hospital  
33

34 583 81 Linköping  
35

36 Phone: +46(0)10 103 18 38  
37

38 [lenna.nilsson@regionostergotland.se](mailto:lenna.nilsson@regionostergotland.se)  
39

40 Word count: 3211  
41  
42  
43  
44  
45  
46  
47  
48  
49  
50  
51  
52  
53  
54  
55  
56  
57  
58  
59  
60

## Abstract

**Objectives:** To describe the implementation of a trigger tool in Sweden and present the national incidence of adverse events (AEs) over a 4-year period during which an ongoing national patient safety initiative was terminated.

**Design:** Cohort study using retrospective record review based on a trigger tool methodology.

**Setting and participants:** Patients  $\geq 18$  years admitted to all somatic acute care hospitals in Sweden from 2013–2016 were randomised into the study.

**Primary and secondary outcome measures:** Primary outcome measure was the incidence of AEs, and secondary measures were type of injury, severity of harm, preventability of AEs, estimated healthcare cost of AEs and incidence of AEs in patients cared for in another type of unit than the one specialised for their medical needs ('off-site').

**Results:** In a review of 64 917 admissions, the average AE rates in 2014 (11.6%), 2015 (10.9%) and 2016 (11.4%) were significantly lower than in 2013 (13.1%). The decrease in the AE rates was seen in different age groups, in both genders and for preventable and non-preventable AEs. The decrease comprised only the least severe AEs. The types of AEs that decreased were hospital-acquired infections, urinary bladder distention and compromised vital signs. Patients cared for 'off-site' had 84% more preventable AEs than patients cared for in the appropriate units. The cost of increased length of stay associated with preventable AEs corresponded to 13–14% of the total cost of somatic hospital care in Sweden.

**Conclusions:** The rate of AEs in Swedish somatic hospitals has decreased from 2013 to 2016. Retrospective record review can be used to monitor patient safety over time, to assess the effects of national patient safety interventions and analyse challenges to patient safety such as the increasing care of patients 'off-site'. It was found that the economic burden of preventable AEs is high.

**Keywords:** Adverse event, Patient harm, Patient safety, Trigger tool

### Strengths and limitations of this study

- The study includes all somatic acute care hospitals in Sweden, except for paediatric units.
- This is a longitudinal study over a 4-year period during which an ongoing national patient safety initiative was terminated.
- An estimation of the economic cost for prolonged hospital stay due to preventable AEs was undertaken.
- The trigger tool and the national database were adaptive to new triggers and trends in healthcare, thus showing the ability to evaluate new patient safety risks.
- Inherent weaknesses in a retrospective record review are poor documentation quality and the risk of hindsight bias.

### Funding statement

This work was supported by the Swedish Association of Local Authorities and Regions by creating and hosting a national database for the reporting of data from the record reviews.

### Competing interests

The authors declare that they have no competing interests.

### Author's contribution

LN, MB-R, MS, UN, CÅ and HR designed and conducted the study. MB-R statistically analysed the data. HR, UN and CÅ undertook the initial interpretation of the data, which was followed by discussions with all the authors. LN and HR drafted the initial version of the manuscript, which was followed by a critical revision process of the intellectual content involving all the authors. All the authors agreed to the final version of the manuscript before submission. All authors agreed to be accountable for the accuracy of any part of the work.

### Data sharing statement

No additional data are available.

## Introduction

Retrospective medical record review (RRR) is an established and validated method to identify adverse events (AEs).<sup>1-4</sup> The method gives an overview of the incidence, nature, preventability and consequences of AEs. This information can be used in systematic quality improvement work to reduce the incidence of AEs. RRR is superior to clinical incident reporting systems for detecting AEs.<sup>3</sup> A list of criteria (triggers) that indicate a higher probability of AEs may be used to identify details in the record that indicate the presence of AEs. The Institute for Healthcare Improvement (IHI) in the US combined topic- and location-specific trigger tools into one Global Trigger Tool (GTT),<sup>5</sup> which is one of the most commonly used trigger tools. Translated and adapted versions of the GTT are available in, for example, Sweden, Denmark, Norway, Germany, Italy and the UK. Although GTT is considered relevant for measuring AEs at the national level, to the best of our knowledge, only Norway and Sweden have used the methodology for this purpose.<sup>6,7</sup>

The present study describes the implementation of a trigger tool in Sweden, including the development of a national database that covers reviews from all acute care hospitals save for paediatric and psychiatric care. We also present the national yearly incidence of AEs over a 4-year period (2013–2016) and estimate the cost of preventable AEs.

## Methods

### *Implementation of the Swedish trigger tool*

The first national handbook for record review was published in 2008. It was based on the IHI-GTT version 2007, which was translated and adapted to a Swedish context. The Swedish handbook included a six-graded preventability scale used in a national survey on AEs initiated by The National Board of Health and Welfare.<sup>8</sup> The trigger tool methodology gradually spread over the country, and in 2011, hospitals in approximately half of the country's 21 regions used the method.

In 2012, a national group of experienced reviewers, in collaboration with a reference group of reviewers, patient safety experts and researchers in the trigger tool field, revised the national handbook.<sup>9</sup> The work was initiated and financed by the Swedish Association of Local Authorities and Regions (SALAR) as part of a national patient safety initiative. The number of triggers was reduced from 53 to 44 based on the fact that the removed triggers seldom pointed to AEs or were not possible to identify in the review. Others were merged together

1  
2  
3 and renamed. Ten new triggers were added based on local review teams' findings and  
4 research pointing to these common AEs. An example of a new trigger added was urinary  
5 bladder distension.<sup>10,11</sup> Review teams were educated in all regions in a coordinated effort  
6 within a national patient safety initiative, which promoted and financially rewarded record  
7 review. This contributed to the rapid use of the method by all somatic acute care hospitals.  
8  
9  
10

### 11 12 *National patient safety initiative and database*

13  
14 Launched by the Swedish government and SALAR, a national initiative to increase patient  
15 safety took place from 2011–2014. The initiative involved financial incentives and included,  
16 among other things, safer use of drugs, prevention of resistance to antibiotics, reduction of  
17 hospital-acquired infections and measurement of the patient safety culture. As a result of the  
18 national initiative, by 2013, all somatic hospitals involved in acute care (n=63) undertook  
19 monthly reviews of patient records to determine the rate and nature of AEs. A database was  
20 developed by SALAR in 2012, and in this database, the review results from each hospital  
21 were entered. These included hospital type, medical speciality, the patient's gender, age and  
22 length of hospital stay and the type, severity and preventability of AEs. The monthly reviews  
23 continued after the termination of the national patient safety initiative in December 2014, and  
24 by December 2016, the database included almost 65 000 admissions.  
25  
26  
27  
28  
29  
30  
31  
32

33 The database was expanded in 2015 to include information on risk factors for AEs, such as  
34 acute admission, surgical intervention and care provided in another type of unit other than the  
35 one specialised for the patient's medical needs ('off-site').  
36  
37  
38  
39

### 40 *Inclusion criteria and sampling*

41 From 2013–2014, the minimum monthly number of randomly selected admissions reviewed  
42 was 40 for university hospitals, 30 for the central county council hospitals and 20 for the  
43 county hospitals.<sup>5</sup> From 2015 and onward, the number of reviewed records was reduced by  
44 50%. Somatic hospital admissions from patients aged 18 years or older with a hospital stay of  
45 at least 24 hours were eligible for inclusion. All records from the whole period of  
46 hospitalisation were reviewed, which sometimes included more than one type of department.  
47  
48  
49  
50  
51  
52

### 53 *Review process*

1  
2  
3 Each hospital had its own review team. The review teams consisted of one or two nurses and  
4 at least one physician. All team members were senior level, had special training in the record  
5 review method and had an interest and knowledge in the field of patient safety. The team  
6 members often represented different medical specialties.  
7  
8

9  
10  
11 A nurse first screened the records for the presence of triggers and possible AEs. In the second  
12 review stage, the team assessed the occurrence of AEs. All AEs were categorised according to  
13 type, severity and preventability using the national handbook. The physician made the final  
14 decisions. There was no assessment of interrater reliability.  
15  
16

### 17 18 19 ***Categorisation of adverse events***

20 An AE was defined as an unintended physical injury resulting from or contributed to by  
21 medical care that required additional monitoring, treatment or hospitalisation or that resulted  
22 in death. An AE was categorised into one of 16 different types (see results). A hospital-  
23 acquired infection was defined as either an infection associated with previous in-hospital  
24 treatment or an infection occurring 48 hours after hospitalisation or within 48 hours after  
25 discharge from the hospital. Each AE could only be categorised into one type.  
26  
27  
28  
29

30  
31  
32 AEs were categorised into one of five severity categories, per the National Coordination  
33 Council for Medication Error Reporting and Prevention index: Category E: contributed to or  
34 resulted in temporary harm and required intervention; Category F: contributed to or resulted  
35 in temporary harm requiring outpatient care, readmission or prolonged hospital care; Category  
36 G: contributed to or caused permanent patient harm; Category H: event that required  
37 lifesaving intervention within 60 minutes and Category I: contributed to the patient's death.  
38  
39  
40  
41

42  
43 An AE was categorised as being preventable or not by using a graded scale of four options: 1.  
44 The AE was 'not preventable'; 2. 'probably not preventable'; 3. 'probably preventable'; and  
45 4. 'certainly preventable'. The handbook gives detailed instructions concerning the difficult  
46 assessment of preventability (Supplementary table S1). AEs categorised as 1 and 2 are  
47 denoted as non-preventable, and AEs categorised as 3 and 4 are denoted as preventable in the  
48 following text and figures.  
49  
50  
51  
52  
53  
54  
55  
56  
57  
58  
59  
60

### ***Statistics***

Data are presented as number (percent), median (range), mean (SD) or mean (95% CI). Comparison of the proportions between two groups was made by chi-squared test and between more than two groups by Z-test with Bonferroni adjustment. Confidence intervals were calculated using a normal distribution approximation. A p-value <0.05 was considered significant. All statistical calculations were made using SPSS Version 22, IBM, New York, United States.

### ***Ethics***

The study was conducted in compliance with the Declaration of Helsinki (World Medical Association, 2013), and because it was a part of quality improvement initiatives in the hospitals, an approval from an ethical committee was not necessary. The principles published in the national ethical guidelines for research were followed (SFS 2003:460). Names and personal identification numbers were not collected or entered into the database.

### ***Patient and Public Involvement***

Patients were not involved in the study design or the implementation of the national trigger tool. Yearly reports from SALAR of AE rates on an aggregated national level have been publically available.

### **Results**

#### ***Results of GTT 2013–2016***

A total of 64 917 admissions were reviewed in 59–63 hospitals during the years 2013–2016. The number of hospitals decreased over the period because two of the minor hospitals stopped reviewing, and two merged with another hospital (Table 1). From the beginning of 2013 to the middle of 2015, there was a continuous decline in the average monthly rates of admissions with AEs and preventable AEs (Figure 1). During the second half of 2015, the rates of AEs increased slightly and subsequently stabilised.

The proportion of admissions with preventable AEs decreased significantly between 2013 and the years 2014, 2015 and 2016, respectively. No significant differences were seen between the other years (Table 1).



1  
2  
3 The decrease in the AE rate can largely be attributed to a reduction in the least severe AEs  
4 (Category E) (Table 2). The types of AEs that decreased significantly were hospital-acquired  
5 infections, urinary bladder distention, compromised vital signs and 'other' (Table 3). The  
6 latter group included allergic reaction, haemorrhage not related to surgery, venous thrombosis  
7 or pulmonary embolus, superficial blood vessel or skin harm, anaesthetic-related AE and any  
8 other AE. Among the hospital-acquired infections, there were significant reductions in the  
9 rate of admissions with pneumonia, ventilator-associated pneumonia and 'other infections'.

10  
11  
12  
13  
14  
15  
16 When aggregating data for the years 2013–2016, 11.4% of the AEs were categorised as 'not  
17 preventable', 27.2% as 'probably not preventable', 39.4% as 'probably preventable', and  
18 22.0% as 'certainly preventable'. Consequently, 61.4% of the AEs were judged to be  
19 preventable (probably and certainly preventable). The types of AEs considered most  
20 preventable were pressure ulcer (91%) and urinary bladder distention (88%). The  
21 corresponding preventability rates were for hospital-acquired infections (60%), fall injuries  
22 (60%), AEs caused by surgery or invasive procedures (56%), 'other' (54%), drug-related AE  
23 (46%), compromised vital signs (41%), neurological AE (38%) and postpartum or obstetric  
24 AE (41%).

25  
26  
27  
28  
29  
30  
31  
32 AEs were more common in patients aged 65 years or older than in patients 18–64 years of age  
33 ( $p < 0.001$ ). The number of admissions with AEs decreased between 2013 and 2016 in the  
34 younger ( $P = 0.02$ ) and older patient groups ( $p < 0.001$ ) (Figure 2). The reductions were  
35 significant also for the 'preventable AEs' (younger  $p = 0.05$ , older  $p < 0.001$ ).

36  
37  
38  
39  
40  
41  
42  
43  
44  
45  
46  
47  
48  
49  
50  
51  
52  
53  
54  
55  
56  
57  
58  
59  
60  
When aggregating data for the years 2013–2016, men had a significantly higher rate of  
admissions with AEs than women (12.5% vs. 11.5%,  $p < 0.001$ ). Men had significantly higher  
rates of hospital-acquired infections and urinary bladder distention. From aggregated data  
2013-2016, when stratifying the older age group into three groups (65-74, 75-84 and  $\geq 85$   
years) the rate of AEs were 12.0%, 13.2% and 14.3%, respectively. The difference was  
significant between the group 65-74 years and the two older age groups ( $p = 0.02$  and  
 $p < 0.0001$ , respectively).

Aggregated data for 2015–2016 showed that the incidence of preventable AEs was almost  
100% higher in patients who had undergone surgery or another invasive procedure ( $n = 9584$ ;

1  
2  
3 p<0.001) and approximately 84% higher in patients treated in another unit than the unit  
4 specialised to their medical needs ('off-site') (n=984; p<0.001). No difference in AE rates  
5 was found between acute and planned admissions (p=0.72) (Figure 3).  
6  
7

8  
9 Acute admissions were more common in males compared to women (80.5% vs. 78.5%,  
10 p=0.001) and in patients aged 65 years or older compared to patients under 65 years of age  
11 (82.2% vs. 73.7%, p<0.001). The proportion of admissions where the patient underwent  
12 surgery or another invasive procedure did not differ between the genders. In patients who had  
13 surgery, the rate of AEs was higher in acute admissions than in planned admissions (19.1%  
14 vs. 13.1%, p<0.001).  
15  
16  
17  
18  
19

20  
21 The proportion of patients cared for 'off-site' increased from 3.1% in 2015 to 4.5% in 2016  
22 (p<0.001). Patients aged 65 years or older were more often treated 'off-site' than younger  
23 patients (4.1% vs. 3.1%, p<0.001). No differences related to gender were observed. The most  
24 common type of AEs in patients cared for 'off-site' were hospital-acquired infections (36.0%)  
25 and 'other' (19.8%), which includes skin injury, superficial vessel injury and vein thrombosis  
26 or pulmonary embolism.  
27  
28  
29  
30

31  
32 The mean (SD) length of hospital stay (LOS) in aggregated data for 2013–2016 was 7.1 (8.1)  
33 days. LOS for the admissions without AEs was 6.2 (6.6) days while admissions with  
34 preventable AEs was 14.2 (14.5) days. A significantly longer LOS in patients with AEs was  
35 seen in both age groups of both men and women (Figure 4). The LOS was significantly longer  
36 in older patients ( $\geq 65$  years) than in younger (18–64 years) both for patients with and without  
37 AEs. When stratifying the older age group into three groups (65–74, 75–84 and  $\geq 85$  years) no  
38 difference was seen between these three groups in LOS among patients with preventable AEs.  
39  
40  
41  
42  
43

44  
45 The mean difference in LOS between hospital stays without AEs and those with preventable  
46 AEs was 8 days. The average incidence of preventable AEs (2013–2016) was 8%, and the  
47 average number of hospital admissions per year was almost 1.4 million. Accordingly, it can  
48 be estimated that preventable AEs affected some 110 000 hospital admissions per year and  
49 were associated with 880 000 extra days of hospitalisation. With the mean cost for 1 day of  
50 hospitalisation being approximately 10 000 SEK, the annual cost for preventable AEs can be  
51 estimated at 880 million euros. This corresponds to approximately 13–14% of the total cost of  
52  
53  
54  
55  
56

1  
2  
3 adult somatic hospital care in Sweden. During 2015 and 2016, approximately 13 000 records  
4 were reviewed yearly. The estimated annual total cost for record review was 0.4–0.5 million  
5 euros.  
6  
7

### 9 *National feedback of the results based on GTT*

10 Regular yearly reports from SALAR described the development of AE rates on an aggregated  
11 national level. Also, specific reports for surgical care,<sup>12</sup> orthopaedic care,<sup>13</sup> obstetrics and  
12 gynaecology<sup>14</sup> and hospital-acquired infections<sup>15</sup> were published. The mapping of AEs is an  
13 important basis for improvement work. In 2016, SALAR published an inventory of all patient  
14 safety initiatives undertaken by hospitals or departments based on the record review findings.  
15 The prominent areas for the 268 different improvement initiatives were pressure ulcers,  
16 education of patient safety experts, falls, healthcare-associated infections, urinary bladder  
17 distension, surgical harm and compromised vital signs.  
18  
19  
20  
21  
22  
23  
24

### 25 **Discussion**

26 From our nationwide review of almost 65 000 randomly selected admissions to acute care  
27 hospitals, we have shown there was a reduction in the rate of AEs between 2013 and 2014,  
28 2015 and 2016, respectively. However, a gradual decrease in the rate of admissions with AEs  
29 was seen from 2013 until mid-2015; thereafter, the AE rate rose to, and stabilised at, a slightly  
30 higher level. The initial gradual decrease in AE rate could reflect the focus on patient safety  
31 promoted by the national patient safety initiative. The decrease in the rate of AEs continued 6  
32 months after the termination of the initiative (2014), which may indicate that the effect of the  
33 4-year long initiative persisted for a short period after it was terminated. The subsequent  
34 broken trend after the termination of the patient safety initiative may reflect the hospital  
35 leadership shifting their focus and a subsequent decrease in the efforts to reduce the rate of  
36 AEs. Conceivably, other factors not related to the initiative may have influenced the trends  
37 seen in the AE rates. The higher proportion of patients treated ‘off-site’ 2016 compared to  
38 2015 might explain to some extent the increase in the rates of AEs.  
39  
40  
41  
42  
43  
44  
45  
46  
47  
48

49 The study has some strengths. To our knowledge, the current study is the largest published  
50 trigger tool study, including all somatic acute hospitals in Sweden, save for paediatric and  
51 psychiatric care. Also, the current study covers a substantial period of time. The revision of  
52 the trigger tool made it possible to add triggers found to indicate AEs that were not included  
53  
54  
55  
56

1  
2  
3 in the initial IHI tool, for example, urinary bladder distension, and the national database  
4 enabled a continuous systematic, but also flexible, collection of data because we were able to  
5 add administrative data that enabled the detection of safety risks connected to trends in  
6 healthcare, for example, increasing 'off-site' care. The trigger tool has high specificity, high  
7 reliability, is more sensitive than other methods,<sup>16,17</sup> and large-scale implementations of the  
8 GTT including modifications have been successful in other studies.<sup>6,18,19</sup>  
9  
10  
11  
12  
13

14 In retrospective record review studies, a potential weakness is poor documentation quality,  
15 which means only documented AEs can be identified. The true number of AEs and even  
16 premature death is thus probably higher than found only by RRR.<sup>20</sup> Postdischarge patient  
17 interviews have shown that even serious AEs are not documented in the record and that AEs  
18 that not occur in close proximity to hospital stay might go unnoticed.<sup>21</sup> An example is a  
19 forgotten vaccination against pneumococcal infection in connection with splenectomy that  
20 may give a serious infection decades later. Direct observation of care is another way of  
21 detecting AEs not captured by a record review.<sup>22</sup> Another weakness is the risk of hindsight  
22 bias when assessing the preventability of AEs. Two-thirds of the AEs were classified as  
23 'probably preventable' or 'probably not preventable', which illustrates the difficulty in  
24 determining preventability with certainty. A further limitation is that we did not assess inter-  
25 rater reliability. The reason is that as the record reviews were part of a national patient safety  
26 initiative with the primary focus on changes in AE rates of individual hospitals and not for  
27 comparisons inbetween hospitals. The number of reviewed admissions from university  
28 hospitals, central county council hospitals and small hospitals does not fully reflect the true  
29 proportion of admissions to these hospital categories. Because the rates of AEs differ between  
30 hospital types, this must be taken into account when estimating the true national average rate  
31 of AEs. When doing so, the national rates of AEs presented in this paper increase by  
32 approximately 10%.  
33  
34  
35  
36  
37  
38  
39  
40  
41  
42  
43  
44  
45

46 We have demonstrated an increased rate of AEs in patients cared for in another type of unit  
47 other than the one specialised for their medical needs. The main reason why patients are cared  
48 for 'off-site' is a shortage of available beds due to lack of nurses. Actions need to be taken to  
49 reduce the number of 'off-site' patients.  
50  
51  
52  
53  
54  
55  
56  
57  
58  
59  
60

1  
2  
3 As shown earlier,<sup>23</sup> a hospital-acquired infection is the most common type of AE, and its  
4 incidence fell during the study period. Evidence-based programs to prevent central venous  
5 catheter-associated infections, postoperative wound infections and urinary tract infections  
6 were promoted nationally during the study period. This was carried out by conducting a  
7 continuous follow-up on compliance to basic hygiene rules and dress code on a department  
8 level. Conceivably, the promotion of measures to reduce the incidence of hospital-acquired  
9 infections during the patient safety initiative was successful and resulted in a reduction of  
10 infection rates.  
11  
12  
13  
14  
15

16  
17 Urinary bladder distention was most often regarded as preventable, and the rates decreased  
18 over time. This could in part be because of the use of a stricter definition after 2013, but this  
19 problem was extensively addressed by physicians as well as nursing organisations. The  
20 decrease in the rates of compromised vital signs could reflect an increased use of vital sign  
21 checks, such as the modified early warning score (MEWS)<sup>24</sup> and rapid response teams.<sup>25</sup>  
22  
23  
24  
25

26  
27 The higher incidence of AEs found among men can partly be attributed to their higher rates of  
28 hospital-acquired infections and urinary bladder distention. The reason behind the former  
29 remains to be explained. Another explanation is that the present study included gynaecology  
30 and obstetrics, where AE rates are lower than in other medical disciplines.<sup>26</sup>  
31  
32  
33  
34

35 The suffering associated with patient harm for the patients, relatives and involved personnel is  
36 high but cannot easily be quantified. There is also an economic burden associated with patient  
37 harm, both on healthcare and society. The golden standard to estimate the financial cost of  
38 AEs for healthcare is considered to be retrospective record review.<sup>27</sup> Our estimate, based  
39 solely on the costs of prolonged LOS, is in line with a recent report that suggested that 15% of  
40 hospital expenditures in Organisation for Economic Co-operation and Development (OECD)  
41 countries relate to AEs.<sup>28</sup> These entail additional treatment and diagnostic procedures,  
42 (re)admission to hospital and a prolonged hospital stay. In line with our finding, the OECD  
43 report estimated that 6–8 additional days are spent in the hospital for patients having an AE.<sup>26</sup>  
44 With a longer LOS, it is probable that patients are more exposed to AEs. Regrettably, we did  
45 not collect data on day of occurrence of AEs. However, our group has previously shown that  
46 AEs most often occur early during the hospital stay or cause the hospitalisation.<sup>29</sup> The OECD  
47  
48  
49  
50  
51  
52  
53  
54  
55

1  
2  
3 report<sup>28</sup> emphasises that the costs for preventive actions are substantially lower than the costs  
4 of AEs.  
5  
6

7 To our knowledge, Norway and Sweden are the only countries so far that has have evaluated  
8 the effect of a national patient safety initiative using monthly assessments of AE rates based  
9 on GTT. Accordingly, some 40 000 hospital admissions were reviewed during the Norwegian  
10 patient safety campaign, and AE rates decreased from 16.1% (2011) to 13.0% ( 2013).<sup>6</sup> The  
11 rates and types of AEs in Norway and Sweden in 2013 have been shown to be similar.<sup>7</sup>  
12  
13  
14  
15

16  
17 In conclusion, AE rates in Swedish somatic acute care hospitals decreased between 2013 and  
18 2014, 2015 and 2016, respectively. Retrospective record review is a useful method to monitor  
19 patient safety over time and to assess the effects of national patient safety interventions. Off-  
20 site care of patients is becoming more common. This increases the incidence of AEs and is a  
21 challenge to patient safety. The economic burden of preventable AEs is high.  
22  
23  
24  
25  
26  
27  
28  
29  
30  
31  
32  
33  
34  
35  
36  
37  
38  
39  
40  
41  
42  
43  
44  
45  
46  
47  
48  
49  
50  
51  
52  
53  
54  
55  
56  
57  
58  
59  
60

## References

1. Naessens JM, Campbell CR, Huddleston JM, et al. A comparison of hospital adverse events identified by three widely used detection methods. *Int J Qual Health Care* 2009;21:301–7.
2. Christiaans-Dingelhoff I, Smits M, Zwaan L, et al. To what extent are adverse events found in patient records reported by patients and healthcare professionals via complaints, claims and incident reports? *BMC Health Serv Res* 2011;11:49.
3. Classen David C, Resar R, Griffin F, et al. "Global Trigger Tool" shows that adverse events in hospitals may be ten times greater than previously measured. *Health Aff* 2011;30:581–9.
4. Unbeck M, Muren O, Lillkrona U. Identification of adverse events at an orthopaedics department in Sweden. *Acta Orthop* 2008;79:396–403.
5. Griffin FA, Resar RK. IHI Global Trigger Tool for measuring adverse events. IHI Innovation Series white paper. Cambridge, Massachusetts: Institute for Healthcare Improvement; 2007.
6. Deilkås ET, Bukholm G, Lindstrom JC, et al. Monitoring adverse events in Norwegian hospitals from 2010 to 2013. *BMJ Open* 2015;5:e008576.
7. Deilkås ET, Risberg MB, Haugen M, et al. Exploring similarities and differences in hospital adverse event rates between Norway and Sweden using Global Trigger Tool. *BMJ Open* 2017;7:e012492.
8. Soop M, Fryksmark U, Köster M, et al. The incidence of adverse events in Swedish hospitals: a retrospective medical record review study. *Int J Qual Health Care* 2009;21:285–91.
9. Markörbaserad Journalgranskning för att identifiera och mäta skador i vården [in Swedish]. Sveriges kommuner och Landsting: ETC kommunikation; 2012:ISBN: 978-917-164-847.
10. Unbeck M, Dalen N, Muren O, et al.. Healthcare processes must be improved to reduce the occurrence of orthopaedic adverse events. *Scand J Caring Sci*. 2010;24:671–7.
11. Joelsson-Alm E, Nyman CR, Lindholm C, et al. Perioperative bladder distension: a prospective study. *Scand J Urol Nephrol*. 2009;43:58-62.



- 1  
2  
3 12. Nilsson L, Risberg MB, Montgomery A, et al. Preventable adverse events in surgical care  
4 in Sweden: a nationwide review of patient notes. *Medicine (Baltimore)* 2016;95:e3047.  
5  
6  
7 13. Rutberg H, Borgstedt-Risberg M, Gustafson P, et al. Adverse events in orthopedic care  
8 identified via the Global Trigger Tool in Sweden—implications on preventable prolonged  
9 hospitalizations. *Patient Saf Surg.* 2016;10:23.  
10  
11  
12 14. Skador i vården- skadefrekvens och skadepanorama för obstetric och gynekologi (In  
13 Swedish) [http://lof.se/wp-content/uploads/Skador-i-vården-skadefrekvens-och-](http://lof.se/wp-content/uploads/Skador-i-vården-skadefrekvens-och-skadepanorama-för-obstetrik-och-gynekologi.pdf)  
14 [skadepanorama-för-obstetrik-och-gynekologi.pdf](http://lof.se/wp-content/uploads/Skador-i-vården-skadefrekvens-och-skadepanorama-för-obstetrik-och-gynekologi.pdf) (Accessed Sept 2017)  
15  
16  
17  
18 15. Vårdrelaterade infektioner. Kunskap, konsekvenser, kostnader (In Swedish). ISBN: 978-  
19 91-7585-475-5 <http://webbutik.skl.se/bilder/artiklar/pdf/7585-475-5.pdf?issuusl=ignore>  
20 (Accessed Sept 2017)  
21  
22  
23  
24 16. Sharek PJ, Parry G, Goldmann D, et al. Performance characteristics of a methodology to  
25 quantify adverse events over time in hospitalized patients. *Health Serv Res.* 2011;46:654–78.  
26  
27  
28 17. Naessens JM, O'Byrne TJ, Johnson MG, et al. Measuring hospital adverse events:  
29 assessing inter-rater reliability and trigger performance of the Global Trigger Tool. *Int J Qual*  
30 *Health Care.* 2010;22:266–74.  
31  
32  
33  
34 18. Good VS, Saldaña M, Gilder R, et al. Large-scale deployment of the Global Trigger Tool  
35 across a large hospital system: refinements for the characterisation of adverse events to  
36 support patient safety learning opportunities. *BMJ Qual Saf.* 2011;20:25–30.  
37  
38  
39  
40 19. Garrett PR Jr, Sammer C, Nelson A, et al. Developing and implementing a standardized  
41 process for global trigger tool application across a large health system. *Jt Comm J Qual*  
42 *Patient Saf.* 2013;39:292–7.  
43  
44  
45  
46 20. James JT. A new evidence-based estimate of patient harms associated with hospital care.  
47 *J Patient Saf* 2013;9: 122Y128.  
48  
49  
50  
51 21. Weissman JS, Schneider EC, Weingart SN, et al. Comparing patient-reported hospital  
52 adverse events with medical record review: do patients know something that hospitals do not?  
53 *Ann Intern Med.* 200;149:100-8.  
54  
55  
56  
57  
58  
59  
60



- 1  
2  
3 22. Flynn EA, Barker KN, Pepper GA, Bates DW, Mikeal RL. Comparison of methods for  
4 detecting medication errors in 36 hospitals and skilled-nursing facilities. *Am J Health Syst*  
5 *Pharm.* 2002;59:436-46.23. Hibbert PD, Molloy CJ, Hooper TD, et al. The application of the  
6 Global Trigger Tool: a systematic review. *Int J Qual Health Care* 2016;28:640–9.  
7  
8  
9  
10 24. Smith ME, Chiovaro JC, O'Neil M, et al. Early warning system scores for clinical  
11 deterioration in hospitalized patients: a systematic review. *Ann Am Thorac Soc.*  
12 2014;11:1454-65.  
13  
14  
15 25. Solomon RS, Corwin GS, Barclay DC, et al. Effectiveness of rapid response teams on  
16 rates of in-hospital cardiopulmonary arrest and mortality: a systematic review and meta-  
17 analysis. *J Hosp Med.* 2016;11:438–45.  
18  
19  
20 26. Leape LL, Brennan TA, Laird N, et al. The nature of adverse events in hospitalized  
21 patients — results of the Harvard Medical Practice Study II. *N Engl J Med.* 1991;324:377–  
22 384.  
23  
24  
25 27. Jackson T. One dollar in seven: Scoping the Economics of Patient Safety. *The Canadian*  
26 *Patient Safety Institute* 2009;  
27 [http://www.patientsafetyinstitute.ca/en/toolsResources/Research/commissionedResearch/Eco-](http://www.patientsafetyinstitute.ca/en/toolsResources/Research/commissionedResearch/EconomicsofPatientSafety/Documents/Economics%20of%20Patient%20Safety%20Literature%20Review.pdf)  
28 [nomicsofPatientSafety/Documents/Economics%20of%20Patient%20Safety%20Literature%20](http://www.patientsafetyinstitute.ca/en/toolsResources/Research/commissionedResearch/EconomicsofPatientSafety/Documents/Economics%20of%20Patient%20Safety%20Literature%20Review.pdf)  
29 [Review.pdf](http://www.patientsafetyinstitute.ca/en/toolsResources/Research/commissionedResearch/EconomicsofPatientSafety/Documents/Economics%20of%20Patient%20Safety%20Literature%20Review.pdf) (Accessed Sept 2017)  
30  
31  
32  
33 28. Slawomirski L, Auraaen A, Klazinga N. The economics of patient safety: strengthening a  
34 value-based approach to reducing patient harm at national level. OECD, Directorate for  
35 Employment, Labour and Social Affairs; 2017.  
36  
37  
38 29. Rutberg H, Borgstedt Risberg M, Sjö Dahl R, et al. Characterisations of adverse events  
39 detected in a university hospital: a 4-year study using the Global Trigger Tool method. *BMJ*  
40 *Open.* 2014;4:e004879.  
41  
42  
43  
44  
45  
46  
47

### 48 Acknowledgments

49 The authors are grateful for the contribution from all review teams.  
50  
51  
52  
53  
54  
55  
56  
57  
58  
59  
60

Table 1. The number of hospitals and admissions, demographics and the proportion of admissions with adverse events and preventable adverse events

|                                                  | 2013                          | 2014                          | 2015                          | 2016                          |
|--------------------------------------------------|-------------------------------|-------------------------------|-------------------------------|-------------------------------|
| Number of hospitals                              | 63                            | 63                            | 62                            | 59                            |
| Number of admissions                             | 19 927                        | 18 629                        | 13 771                        | 12 590                        |
| Age (median (range)), years                      | 71 (18-105)                   | 71 (18-109)                   | 71 (18-108)                   | 72 (18-105)                   |
| Men, percent                                     | 46,8                          | 46,0                          | 47,1                          | 48,0                          |
| Admissions with AEs, percent (95%CI)             | 13.1 (12.7-13.6) <sup>a</sup> | 11.6 (11.2-12.1) <sup>a</sup> | 10.9 (10.4-11.4) <sup>a</sup> | 11.4 (10.9-12.0) <sup>a</sup> |
| Admissions with preventable AEs, percent (95%CI) | 8.7 (8.3-9.1) <sup>a</sup>    | 7.4 (7.1-7.8) <sup>a</sup>    | 7.0 (6.6-7.4) <sup>a</sup>    | 7.2 (6.7-7.6) <sup>a</sup>    |

AE: adverse event; CI: 95% confidence interval; <sup>a</sup>significant differences compared to 2013

Table 2. Proportion (percent (95%CI)) of admissions with adverse events classified according to severity

|                                                                                                                   | 2013             | 2014                          | 2015                          | 2016                          |
|-------------------------------------------------------------------------------------------------------------------|------------------|-------------------------------|-------------------------------|-------------------------------|
| <b>Severity</b>                                                                                                   |                  |                               |                               |                               |
| E: contributed to or resulted in temporary harm and required intervention                                         | 7.40 (7.03-7.77) | 6.08 (5.73-6.42) <sup>a</sup> | 5.50 (5.12-5.89) <sup>a</sup> | 5.99 (5.57-6.40) <sup>a</sup> |
| F: contributed to or resulted in temporary harm requiring outpatient care, readmission or prolonged hospital care | 6.15 (5.81-6.48) | 5.84 (5.50-6.18)              | 5.74 (5.36-6.13)              | 5.76 (5.35-6.17)              |
| G: contributed to or caused permanent patient harm                                                                | 0.41 (0.32-0.50) | 0.27 (0.20-0.35)              | 0.29 (0.20-0.38)              | 0.38 (0.27-0.49)              |
| H: event that required lifesaving intervention required within 60 minutes                                         | 0.09 (0.05-0.13) | 0.08 (0.04-0.12)              | 0.12 (0.06-0.17)              | 0.10 (0.04-0.15)              |
| I: contributed to the patient's death                                                                             | 0.31 (0.23-0.38) | 0.23 (0.16-0.29)              | 0.23 (0.15-0.31)              | 0.24 (0.15-0.32)              |

AE: adverse event; CI: 95% confidence interval; <sup>a</sup>significant differences compared to 2013.

Table 3. Proportion (percent (95 % CI)) of admissions with adverse events classified according to type

|                                           | 2013             | 2014                          | 2015                          | 2016                          |
|-------------------------------------------|------------------|-------------------------------|-------------------------------|-------------------------------|
| <b>Type</b>                               |                  |                               |                               |                               |
| Hospital-acquired infection               | 5.2<br>(4.9-5.5) | 4.6<br>(4.3-4.9) <sup>a</sup> | 4.5<br>(4.1-4.8) <sup>a</sup> | 4.3<br>(4.0-4.7) <sup>a</sup> |
| Infection other                           | 1.4<br>(1.2-1.6) | 1.0<br>(0.8-1.1) <sup>a</sup> | 1.1<br>(0.9-1.3)              | 0.9<br>(0.8-1.1) <sup>a</sup> |
| Urinary tract infection                   | 1.4<br>(1.3-1.6) | 1.5<br>(1.4-1.7)              | 1.3<br>(1.1-1.5)              | 1.3<br>(1.1-1.5)              |
| Postoperative wound infection             | 1.2<br>(1.1-1.4) | 1.2<br>(1.0-1.3)              | 1.1<br>(0.9-1.2)              | 1.1<br>(0.9-1.3)              |
| Pneumonia                                 | 0.7<br>(0.6-0.8) | 0.5<br>(0.4-0.6) <sup>a</sup> | 0.5<br>(0.4-0.6) <sup>a</sup> | 0.5<br>(0.4-0.6) <sup>a</sup> |
| Sepsis                                    | 0.5<br>(0.4-0.6) | 0.3<br>(0.3-0.4) <sup>a</sup> | 0.4<br>(0.3-0.6)              | 0.5<br>(0.4-0.6)              |
| Central venous line infection             | 0.2<br>(0.1-0.2) | 0.1<br>(0.0-0.1)              | 0.1<br>(0.0-0.1)              | 0.1<br>(0.0-0.2)              |
| Ventilator associated pneumonia           | 0.1<br>(0.1-0.2) | 0.0<br>(0.0-0.1) <sup>a</sup> | 0.1<br>(0.0-0.1)              | 0.1<br>(0.0-0.1) <sup>a</sup> |
| Clostridium difficile infection           | -                | 0.3<br>(0.2-0.3)              | 0.3<br>(0.2-0.3)              | 0.3<br>(0.2-0.3)              |
| Other                                     | 2.7<br>(2.5-3.0) | 2.4<br>(2.2-2.7)              | 2.0<br>(1.8-2.3) <sup>a</sup> | 2.2<br>(2.0-2.5) <sup>a</sup> |
| AEs caused by surgery/invasive procedures | 1.9<br>(1.7-2.1) | 1.8<br>(1.6-2.0)              | 1.8<br>(1.6-2.0)              | 1.6<br>(1.4-1.8)              |
| Urinary bladder distention                | 1.7<br>(1.5-1.9) | 1.0<br>(0.9-1.2) <sup>a</sup> | 1.0<br>(0.9-1.2) <sup>a</sup> | 1.1<br>(0.9-1.3) <sup>a</sup> |
| Drug-related AE                           | 1.4<br>(1.3-1.6) | 1.4<br>(1.2-1.6)              | 1.3<br>(1.1-1.5)              | 1.5<br>(1.3-1.7)              |
| Pressure ulcer (grade 2-4)                | 1.1<br>(1.0-1.3) | 1.0<br>(0.9-1.1)              | 1.2<br>(1.0-1.4)              | 1.3<br>(1.1-1.5)              |
| Fall injury                               | 0.8<br>(0.7-0.9) | 0.9<br>(0.7-1.0)              | 0.7<br>(0.5-0.8)              | 0.7<br>(0.6-0.9)              |
| Compromised vital signs                   | 0.5<br>(0.4-0.6) | 0.3<br>(0.2-0.3) <sup>a</sup> | 0.3<br>(0.2-0.4)              | 0.2<br>(0.1-0.2) <sup>a</sup> |
| Postpartum or obstetric AE*               | 0.2<br>(0.2-0.3) | 0.2<br>(0.2-0.3)              | 0.1<br>(0.1-0.2) <sup>a</sup> | 0.3<br>(0.2-0.4)              |
| Neurological AE                           | 0.1<br>(0.1-0.2) | 0.0<br>(0.0-0.1)              | 0.1<br>(0.0-0.1)              | 0.1<br>(0.1-0.2)              |

AE: adverse event; CI: 95% confidence interval; \*not corrected for the proportion of women in the studied population; <sup>a</sup>significant differences compared to 2013.

1  
2  
3 Figure 1. The proportion of admissions with adverse events (AEs) every month from 2013–  
4 2016.  
5  
6  
7

8 Figure 2. Proportion of admissions with preventable and non-preventable adverse events  
9 (AEs) in younger and older patients from 2013–2016.  
10  
11

12  
13 Figure 3. The proportion of admissions with preventable and non-preventable adverse events  
14 (AEs) in patients with acute admissions, patients who underwent surgery and patients treated  
15 ‘off-site’ from 2015–2016  
16  
17

18  
19  
20 Figure 4. Length of stay (mean, 95% CI) in two age groups of men and women for admissions  
21 without adverse events, with non-preventable adverse events and with preventable adverse  
22 events from 2013–2016.  
23  
24  
25  
26  
27  
28  
29  
30  
31  
32  
33  
34  
35  
36  
37  
38  
39  
40  
41  
42  
43  
44  
45  
46  
47  
48  
49  
50  
51  
52  
53  
54  
55  
56  
57  
58  
59  
60

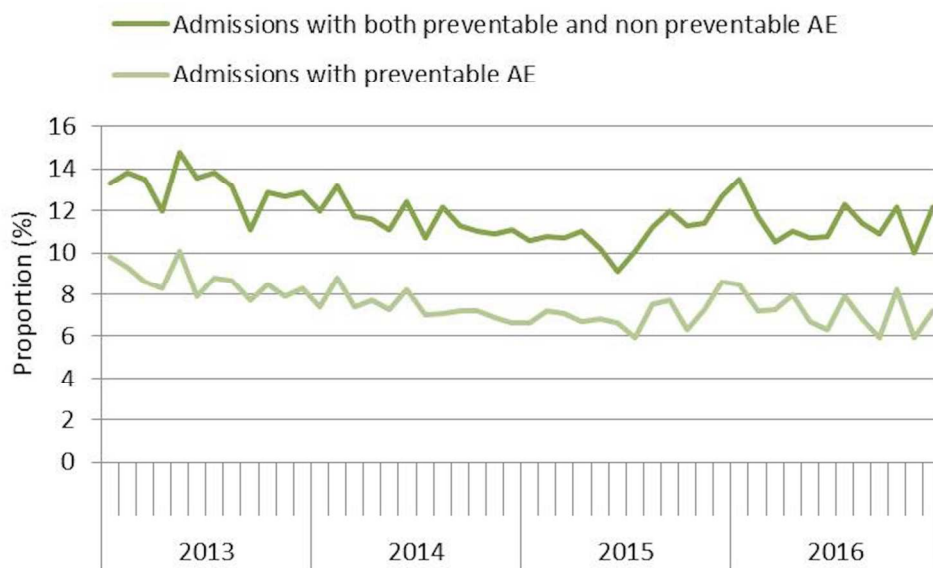

Figure 1. The proportion of admissions with adverse events (AEs) every month from 2013–2016.

127x76mm (300 x 300 DPI)

Review only

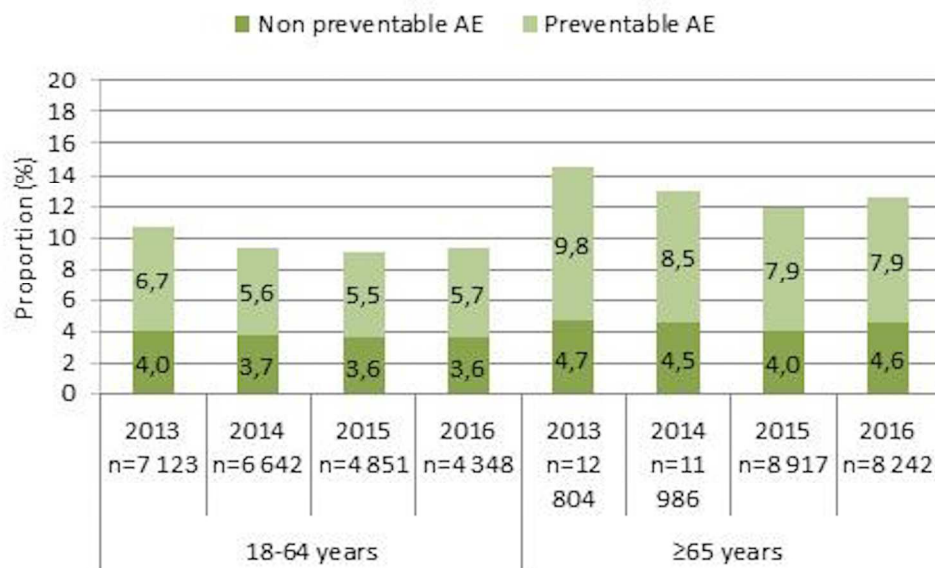

Figure 2. Proportion of admissions with preventable and non-preventable adverse events (AEs) in younger and older patients from 2013–2016.

127x76mm (300 x 300 DPI)

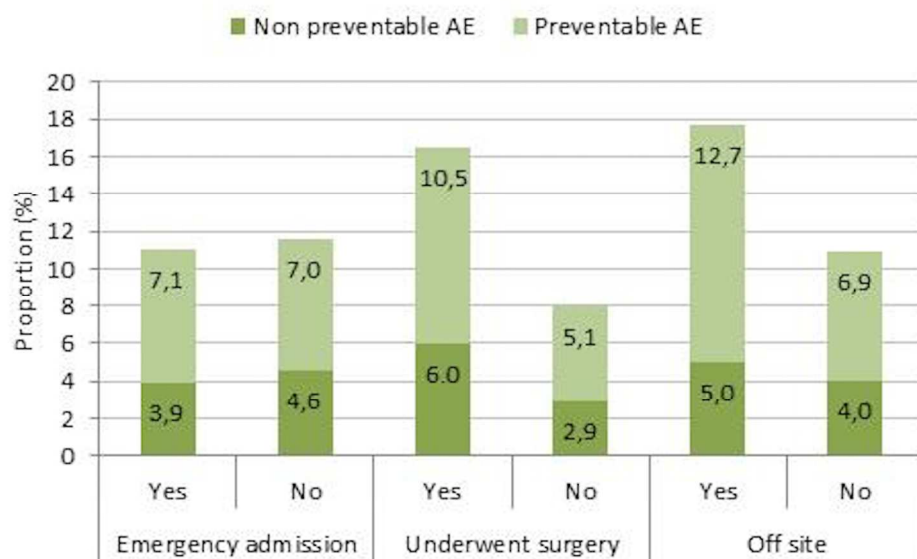

Figure 3. The proportion of admissions with preventable and non-preventable adverse events (AEs) in patients with acute admissions, patients who underwent surgery and patients treated 'off-site' from 2015-2016

129x79mm (300 x 300 DPI)

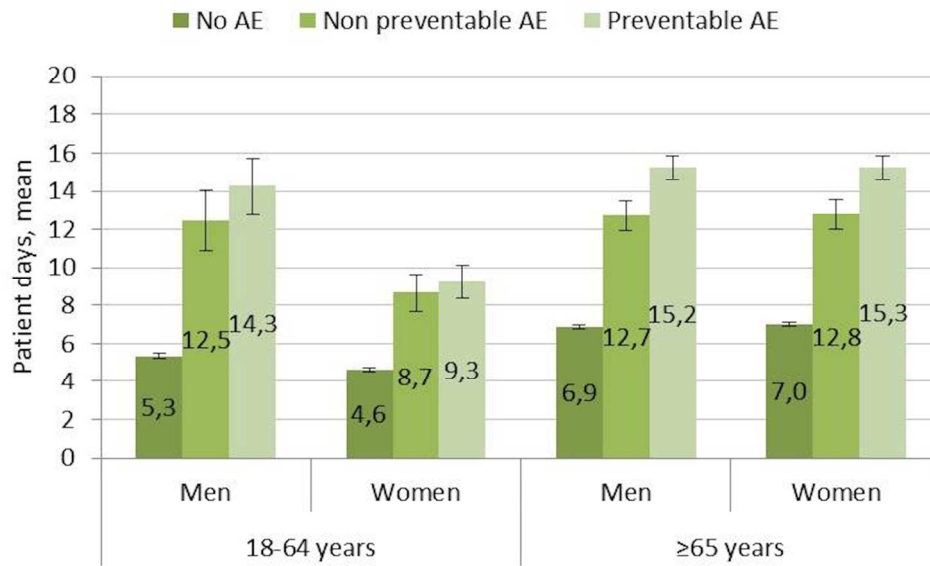

Figure 4. Length of stay (mean, 95% CI) in two age groups of men and women for admissions without adverse events, with non-preventable adverse events and with preventable adverse events from 2013-2016.

127x76mm (300 x 300 DPI)



Table S1. Example of a trigger, its definition and clarifying text.

**Deep vein thrombosis or pulmonary embolism**

|                                                               |                                                                                                                                                                                                                                                                                                                                                                                                                                                                                                                                                                   |
|---------------------------------------------------------------|-------------------------------------------------------------------------------------------------------------------------------------------------------------------------------------------------------------------------------------------------------------------------------------------------------------------------------------------------------------------------------------------------------------------------------------------------------------------------------------------------------------------------------------------------------------------|
| <b>Definition</b>                                             | <b>Deep vein thrombosis or pulmonary embolism diagnosed during hospital care and not apparent on admission</b>                                                                                                                                                                                                                                                                                                                                                                                                                                                    |
| <b>Check for</b>                                              | Venous catheter (central venous catheter, subcutaneous venous port, etc.), recent surgery, immobilisation, obesity, cancer or cancer treatment increases the risk. Has thrombosis prophylaxis been given according to routines?                                                                                                                                                                                                                                                                                                                                   |
| <b>Harm that can be found</b>                                 | Transient or permanent reduction of cardiac or pulmonary function, reduced venous circulation in the lower extremities with oedema and reduced function                                                                                                                                                                                                                                                                                                                                                                                                           |
| <b>Preventability</b>                                         | <p>Deep vein thrombosis should be regarded as preventable if:</p> <p><input type="checkbox"/> Prophylaxis against thrombosis has not been given according to routines.</p> <p><input type="checkbox"/> Increased risk following immobilisation has not been considered, for example, after surgery.</p> <p><input type="checkbox"/> Anticoagulation therapy (e.g, warfarin) has not been adequately controlled.</p> <p>Pulmonary embolus should also be regarded as avoidable if signs of deep vein thrombosis have not been adequately observed and treated.</p> |
| <b>Relevant codes for diagnosis, treatment and medication</b> | ICD-10-code:<br>I82 (Embolus and thrombosis)<br>I26 (Pulmonary embolus)<br>O88.2 (Obstetric embolus due to thrombosis)                                                                                                                                                                                                                                                                                                                                                                                                                                            |
| <b>Results associated to this trigger</b>                     | Results from investigation with ultrasound, CT or phlebography. Results from pulmonary scintigraphy (ventilation and perfusion scintigraphy).                                                                                                                                                                                                                                                                                                                                                                                                                     |

**STROBE 2007 (v4) Statement—Checklist of items that should be included in reports of *cohort studies***

| Section/Topic             | Item # | Recommendation                                                                                                                                                                       | Reported on page # |
|---------------------------|--------|--------------------------------------------------------------------------------------------------------------------------------------------------------------------------------------|--------------------|
| Title and abstract        | 1      | (a) Indicate the study’s design with a commonly used term in the title or the abstract                                                                                               | #1, #2             |
|                           |        | (b) Provide in the abstract an informative and balanced summary of what was done and what was found                                                                                  | #2                 |
| <b>Introduction</b>       |        |                                                                                                                                                                                      |                    |
| Background/rationale      | 2      | Explain the scientific background and rationale for the investigation being reported                                                                                                 | #4                 |
| Objectives                | 3      | State specific objectives, including any prespecified hypotheses                                                                                                                     | #4                 |
| <b>Methods</b>            |        |                                                                                                                                                                                      |                    |
| Study design              | 4      | Present key elements of study design early in the paper                                                                                                                              | #5-6               |
| Setting                   | 5      | Describe the setting, locations, and relevant dates, including periods of recruitment, exposure, follow-up, and data collection                                                      | #4-6               |
| Participants              | 6      | (a) Give the eligibility criteria, and the sources and methods of selection of participants. Describe methods of follow-up                                                           | #5-6               |
|                           |        | (b) For matched studies, give matching criteria and number of exposed and unexposed                                                                                                  |                    |
| Variables                 | 7      | Clearly define all outcomes, exposures, predictors, potential confounders, and effect modifiers. Give diagnostic criteria, if applicable                                             | #6                 |
| Data sources/ measurement | 8*     | For each variable of interest, give sources of data and details of methods of assessment (measurement). Describe comparability of assessment methods if there is more than one group | #6                 |
| Bias                      | 9      | Describe any efforts to address potential sources of bias                                                                                                                            | #6                 |
| Study size                | 10     | Explain how the study size was arrived at                                                                                                                                            | #5                 |
| Quantitative variables    | 11     | Explain how quantitative variables were handled in the analyses. If applicable, describe which groupings were chosen and why                                                         | #7                 |
| Statistical methods       | 12     | (a) Describe all statistical methods, including those used to control for confounding                                                                                                | #7                 |
|                           |        | (b) Describe any methods used to examine subgroups and interactions                                                                                                                  | NA                 |
|                           |        | (c) Explain how missing data were addressed                                                                                                                                          | NA                 |
|                           |        | (d) If applicable, explain how loss to follow-up was addressed                                                                                                                       | NA                 |
|                           |        | (e) Describe any sensitivity analyses                                                                                                                                                | NA                 |
| <b>Results</b>            |        |                                                                                                                                                                                      |                    |

|                          |     |                                                                                                                                                                                                              |        |
|--------------------------|-----|--------------------------------------------------------------------------------------------------------------------------------------------------------------------------------------------------------------|--------|
| Participants             | 13* | (a) Report numbers of individuals at each stage of study—eg numbers potentially eligible, examined for eligibility, confirmed eligible, included in the study, completing follow-up, and analysed            | NA     |
|                          |     | (b) Give reasons for non-participation at each stage                                                                                                                                                         | NA     |
|                          |     | (c) Consider use of a flow diagram                                                                                                                                                                           | NA     |
| Descriptive data         | 14* | (a) Give characteristics of study participants (eg demographic, clinical, social) and information on exposures and potential confounders                                                                     |        |
|                          |     | (b) Indicate number of participants with missing data for each variable of interest                                                                                                                          | #7     |
|                          |     | (c) Summarise follow-up time (eg, average and total amount)                                                                                                                                                  | NA     |
| Outcome data             | 15* | Report numbers of outcome events or summary measures over time                                                                                                                                               | NA     |
| Main results             | 16  | (a) Give unadjusted estimates and, if applicable, confounder-adjusted estimates and their precision (eg, 95% confidence interval). Make clear which confounders were adjusted for and why they were included |        |
|                          |     | (b) Report category boundaries when continuous variables were categorized                                                                                                                                    | #7-9   |
|                          |     | (c) If relevant, consider translating estimates of relative risk into absolute risk for a meaningful time period                                                                                             | NA     |
| Other analyses           | 17  | Report other analyses done—eg analyses of subgroups and interactions, and sensitivity analyses                                                                                                               | #9     |
| <b>Discussion</b>        |     |                                                                                                                                                                                                              |        |
| Key results              | 18  | Summarise key results with reference to study objectives                                                                                                                                                     | #10    |
| <b>Limitations</b>       |     |                                                                                                                                                                                                              |        |
| Interpretation           | 20  | Give a cautious overall interpretation of results considering objectives, limitations, multiplicity of analyses, results from similar studies, and other relevant evidence                                   | #10-11 |
| Generalisability         | 21  | Discuss the generalisability (external validity) of the study results                                                                                                                                        | #12    |
| <b>Other information</b> |     |                                                                                                                                                                                                              |        |
| Funding                  | 22  | Give the source of funding and the role of the funders for the present study and, if applicable, for the original study on which the present article is based                                                | #3     |

\*Give information separately for cases and controls in case-control studies and, if applicable, for exposed and unexposed groups in cohort and cross-sectional studies.

**Note:** An Explanation and Elaboration article discusses each checklist item and gives methodological background and published examples of transparent reporting. The STROBE checklist is best used in conjunction with this article (freely available on the Web sites of PLoS Medicine at <http://www.plosmedicine.org/>, Annals of Internal Medicine at <http://www.annals.org/>, and Epidemiology at <http://www.epidem.com/>). Information on the STROBE Initiative is available at [www.strobe-statement.org](http://www.strobe-statement.org).
