# Supplementary material for: Incidence of adverse events in Sweden during 2013–2016: a cohort study describing the implementation of a national trigger tool
Source: PubMed Central journal article supplement — BMJ Open. 2018 Mar 30;8(3):e020833. doi: 10.1136/bmjopen-2017-020833 (PMC5884347; doi:10.1136/bmjopen-2017-020833), 2018-03-30
Supplement: bmjopen-2017-020833supp001.pdf [file bmjopen-2017-020833supp001.pdf]

Table S1. Example of a trigger, its definition and clarifying text.

## Deep vein thrombosis or pulmonary embolism

|                                                               |                                                                                                                                                                                                                                                                                                                                                                                                                                                                                                                                                |
|---------------------------------------------------------------|------------------------------------------------------------------------------------------------------------------------------------------------------------------------------------------------------------------------------------------------------------------------------------------------------------------------------------------------------------------------------------------------------------------------------------------------------------------------------------------------------------------------------------------------|
| <b>Definition</b>                                             | <b>Deep vein thrombosis or pulmonary embolism diagnosed during hospital care and not apparent on admission</b>                                                                                                                                                                                                                                                                                                                                                                                                                                 |
| <b>Check for</b>                                              | Venous catheter (central venous catheter, subcutaneous venous port, etc.), recent surgery, immobilisation, obesity, cancer or cancer treatment increases the risk. Has thrombosis prophylaxis been given according to routines?                                                                                                                                                                                                                                                                                                                |
| <b>Harm that can be found</b>                                 | Transient or permanent reduction of cardiac or pulmonary function, reduced venous circulation in the lower extremities with oedema and reduced function                                                                                                                                                                                                                                                                                                                                                                                        |
| <b>Preventability</b>                                         | Deep vein thrombosis should be regarded as preventable if:<br><input type="checkbox"/> Prophylaxis against thrombosis has not been given according to routines.<br><input type="checkbox"/> Increased risk following immobilisation has not been considered, for example, after surgery.<br><input type="checkbox"/> Anticoagulation therapy (e.g, warfarin) has not been adequately controlled.<br><br>Pulmonary embolus should also be regarded as avoidable if signs of deep vein thrombosis have not been adequately observed and treated. |
| <b>Relevant codes for diagnosis, treatment and medication</b> | ICD-10-code:<br>I82 (Embolus and thrombosis)<br>I26 (Pulmonary embolus)<br>O88.2 (Obstetric embolus due to thrombosis)                                                                                                                                                                                                                                                                                                                                                                                                                         |
| <b>Results associated to this trigger</b>                     | Results from investigation with ultrasound, CT or phlebography. Results from pulmonary scintigraphy (ventilation and perfusion scintigraphy).                                                                                                                                                                                                                                                                                                                                                                                                  |
